# Supplementary material for: New triterpene saponins from the aerial parts of Androsace umbellata
Source: Royal Society of Chemistry journal article supplement (doi:10.1039/c7ra03948d), 2017-01-01
Supplement: c7ra03948d1.pdf [file c7ra03948d1.pdf]

## New triterpene saponins from the aerial parts of *Androsace*

### *umbellata*

Zhi-Qi Yin<sup>a,†</sup>, Lei Wang<sup>a,b</sup>, Cheng-Hua Li<sup>a</sup>, Dong-Mei Zhang<sup>b</sup>, Wei Zhang<sup>a,b</sup>, Ying Wang<sup>b</sup>, Ming Zhao<sup>c</sup>,  
Wen-Cai Ye<sup>b</sup>, Chun-Tao Che<sup>c,†</sup>

<sup>a</sup>Department of Natural Medicinal Chemistry & State Key Laboratory of Natural Medicines, China Pharmaceutical University, Nanjing 210009, P.R. China. E-mail: cpu-yzq@cpu.edu.cn; Tel: +86-025-86185371

<sup>b</sup>Institute of Traditional Chinese Medicine and Natural Products, College of Pharmacy, Jinan University, Guangzhou 510632, P.R. China

<sup>c</sup>Department of Medicinal Chemistry and Pharmacognosy, and WHO Collaborating Center for Tradition Medicine, College of Pharmacy, University of Illinois at Chicago, Chicago, IL 60612, U.S.A.

### Figures of contents

- Page S4** **Figure S1.** IR Spectrum of **1** (KBr)
- Page S4** **Figure S2.** The <sup>1</sup>H NMR Spectrum of **1** in C<sub>5</sub>D<sub>5</sub>N (500 MHz)
- Page S5** **Figure S3.** The <sup>1</sup>H NMR Spectrum of **1** in C<sub>5</sub>D<sub>5</sub>N (500 MHz) (enlarged)
- Page S5** **Figure S4.** The <sup>1</sup>H NMR Spectrum of **1** in C<sub>5</sub>D<sub>5</sub>N (500 MHz) (enlarged)
- Page S6** **Figure S5.** The <sup>13</sup>H NMR Spectrum of **1** in C<sub>5</sub>D<sub>5</sub>N (500 MHz)
- Page S6** **Figure S6.** The <sup>13</sup>C NMR Spectrum of **1** in C<sub>5</sub>D<sub>5</sub>N (125 MHz) (enlarged)
- Page S7** **Figure S7.** The <sup>13</sup>C NMR Spectrum of **1** in C<sub>5</sub>D<sub>5</sub>N (125 MHz) (enlarged)
- Page S7** **Figure S8.** The HSQC Spectrum of **1** in C<sub>5</sub>D<sub>5</sub>N
- Page S8** **Figure S9.** The HMBC Spectrum of **1** in C<sub>5</sub>D<sub>5</sub>N
- Page S8** **Figure S10.** The ROESY Spectrum of **1** in C<sub>5</sub>D<sub>5</sub>N
- Page S9** **Figure S11.** The HRESIMS Data of **1**
- Page S9** **Figure S12.** IR Spectrum of **2** (KBr)
- Page S10** **Figure S13.** The <sup>1</sup>H NMR Spectrum of **2** in C<sub>5</sub>D<sub>5</sub>N (500 MHz)
- Page S10** **Figure S14.** The <sup>1</sup>H NMR Spectrum of **2** in C<sub>5</sub>D<sub>5</sub>N (500 MHz) (enlarged)
- Page S11** **Figure S15.** The <sup>1</sup>H NMR Spectrum of **2** in C<sub>5</sub>D<sub>5</sub>N (500 MHz) (enlarged)
- Page S11** **Figure S16.** The <sup>1</sup>H NMR Spectrum of **2** in C<sub>5</sub>D<sub>5</sub>N (500 MHz) (enlarged)
- Page S12** **Figure S17.** The <sup>13</sup>C NMR Spectrum of **2** in C<sub>5</sub>D<sub>5</sub>N (125 MHz)

**Page S12 Figure S18.** The  $^1\text{H}$ - $^1\text{H}$  COSY Spectrum of **2** in  $\text{C}_5\text{D}_5\text{N}$

**Page S13 Figure S19.** The HSQC Spectrum of **2** in  $\text{C}_5\text{D}_5\text{N}$

**Page S13 Figure S20.** The HMBC Spectrum of **2** in  $\text{C}_5\text{D}_5\text{N}$

**Page S14 Figure S21.** The ROESY Spectrum of **2** in  $\text{C}_5\text{D}_5\text{N}$

**Page S14 Figure S22.** The TOCSY Spectrum of **2** in  $\text{C}_5\text{D}_5\text{N}$

**Page S15 Figure S23.** The HRESIMS Data of **2**

**Page S15 Figure S24.** IR Spectrum of **3** (KBr)

**Page S16 Figure S25.** The  $^1\text{H}$  NMR Spectrum of **3** in  $\text{C}_5\text{D}_5\text{N}$  (500 MHz)

**Page S16 Figure S26.** The  $^1\text{H}$  NMR Spectrum of **3** in  $\text{C}_5\text{D}_5\text{N}$  (500 MHz) (enlarged)

**Page S17 Figure S27.** The  $^1\text{H}$  NMR Spectrum of **3** in  $\text{C}_5\text{D}_5\text{N}$  (500 MHz) (enlarged)

**Page S17 Figure S28.** The  $^{13}\text{C}$  NMR Spectrum of **3** in  $\text{C}_5\text{D}_5\text{N}$  (123 MHz)

**Page S18 Figure S29.** The  $^1\text{H}$ - $^1\text{H}$  COSY Spectrum of **3** in  $\text{C}_5\text{D}_5\text{N}$

**Page S18 Figure S30.** The HSQC Spectrum of **3** in  $\text{C}_5\text{D}_5\text{N}$

**Page S19 Figure S31.** The HMBC Spectrum of **3** in  $\text{C}_5\text{D}_5\text{N}$

**Page S19 Figure S32.** The ROESY Spectrum of **3** in  $\text{C}_5\text{D}_5\text{N}$

**Page S20 Figure S33.** The TOCSY spectrum of **3** in  $\text{C}_5\text{D}_5\text{N}$

**Page S20 Figure S34.** The HRESIMS Data of **3**

**Page S21 Figure S35.** IR Spectrum of **4** (KBr)

**Page S21 Figure S36.** The  $^1\text{H}$  NMR Spectrum of **4** in  $\text{C}_5\text{D}_5\text{N}$  (500 MHz)

**Page S22 Figure S37.** The  $^1\text{H}$  NMR Spectrum of **4** in  $\text{C}_5\text{D}_5\text{N}$  (500 MHz) (enlarged)

**Page S22 Figure S38.** The  $^1\text{H}$  NMR Spectrum of **4** in  $\text{C}_5\text{D}_5\text{N}$  (500 MHz) (enlarged)

**Page S23 Figure S39.** The  $^{13}\text{C}$  NMR Spectrum of **4** in  $\text{C}_5\text{D}_5\text{N}$  (125 MHz)

**Page S23 Figure S40.** The  $^1\text{H}$ - $^1\text{H}$  COSY Spectrum of **4** in  $\text{C}_5\text{D}_5\text{N}$

**Page S24 Figure S41.** The HSQC Spectrum of **4** in  $\text{C}_5\text{D}_5\text{N}$

**Page S24 Figure S42.** The HMBC Spectrum of **4** in  $\text{C}_5\text{D}_5\text{N}$

**Page S25 Figure S43.** The NOESY Spectrum of **4** in  $\text{C}_5\text{D}_5\text{N}$

**Page S25 Figure S44.** The TOCSY Spectrum of **4** in  $\text{C}_5\text{D}_5\text{N}$

**Page S26 Figure S45.** The HRESIMS Data of **4**

**Page S26** **Figure S46.** IR Spectrum of **5** (KBr)

**Page S27** **Figure S47.** The  $^1\text{H}$  NMR Spectrum of **5** in  $\text{C}_5\text{D}_5\text{N}$  (500 MHz)

**Page S27** **Figure S48.** The  $^1\text{H}$  NMR Spectrum of **5** in  $\text{C}_5\text{D}_5\text{N}$  (500 MHz) (enlarged)

**Page S28** **Figure S49.** The  $^1\text{H}$  NMR Spectrum of **5** in  $\text{C}_5\text{D}_5\text{N}$  (500 MHz) (enlarged)

**Page S28** **Figure S50.** The  $^{13}\text{C}$  NMR Spectrum of **5** in  $\text{C}_5\text{D}_5\text{N}$  (125 MHz)

**Page S29** **Figure S51.** The  $^1\text{H}$ - $^1\text{H}$  COSY Spectrum of **5** in  $\text{C}_5\text{D}_5\text{N}$

**Page S29** **Figure S52.** The HSQC Spectrum of **5** in  $\text{C}_5\text{D}_5\text{N}$

**Page S30** **Figure S53.** The HMBC Spectrum of **5** in  $\text{C}_5\text{D}_5\text{N}$

**Page S30** **Figure S54.** The ROESY Spectrum of **5** in  $\text{C}_5\text{D}_5\text{N}$

**Page S31** **Figure S55.** The TOCSY Spectrum of **5** in  $\text{C}_5\text{D}_5\text{N}$

**Page S31** **Figure S56.** The HRESIMS Data of **5**

**Page S32** **Figure S57.** IR Spectrum of **6** (KBr)

**Page S32** **Figure S58.** The  $^1\text{H}$  NMR Spectrum of **6** in  $\text{C}_5\text{D}_5\text{N}$  (500 MHz)

**Page S33** **Figure S59.** The  $^1\text{H}$  NMR Spectrum of **6** in  $\text{C}_5\text{D}_5\text{N}$  (500 MHz) (enlarged)

**Page S33** **Figure S60.** The  $^1\text{H}$  NMR Spectrum of **6** in  $\text{C}_5\text{D}_5\text{N}$  (500 MHz) (enlarged)

**Page S34** **Figure S61.** The  $^{13}\text{C}$  NMR Spectrum of **6** in  $\text{C}_5\text{D}_5\text{N}$  (125 MHz)

**Page S34** **Figure S62.** The HSQC Spectrum of **6** in  $\text{C}_5\text{D}_5\text{N}$

**Page S35** **Figure S63.** The HMBC Spectrum of **6** in  $\text{C}_5\text{D}_5\text{N}$

**Page S35** **Figure S64.** The TOCSY Spectrum of **6** in  $\text{C}_5\text{D}_5\text{N}$

**Page S36** **Figure S65.** The HRESIMS Data of **6**

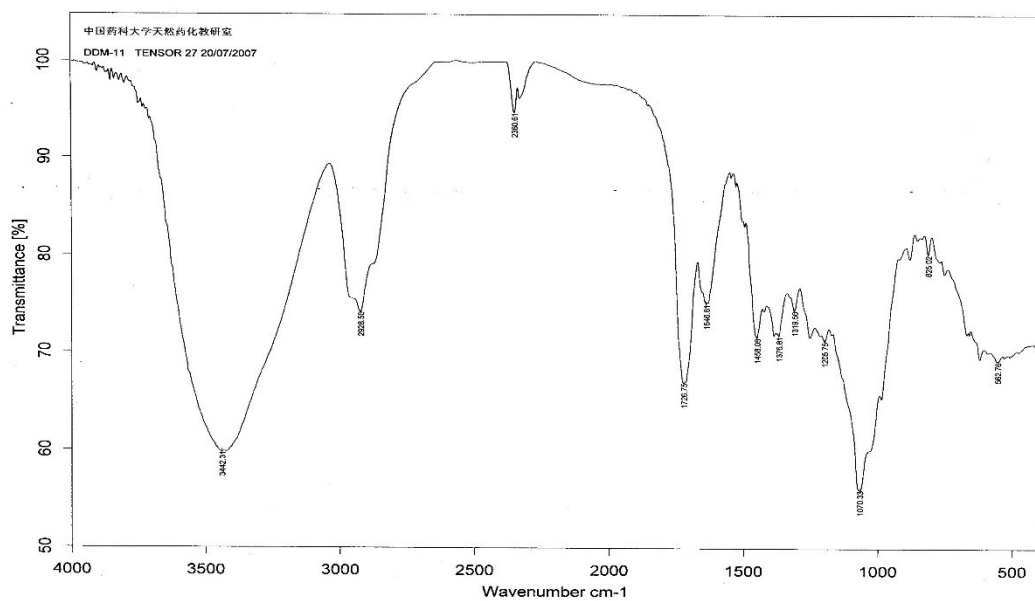

Figure S1. IR Spectrum of **1** (KBr)

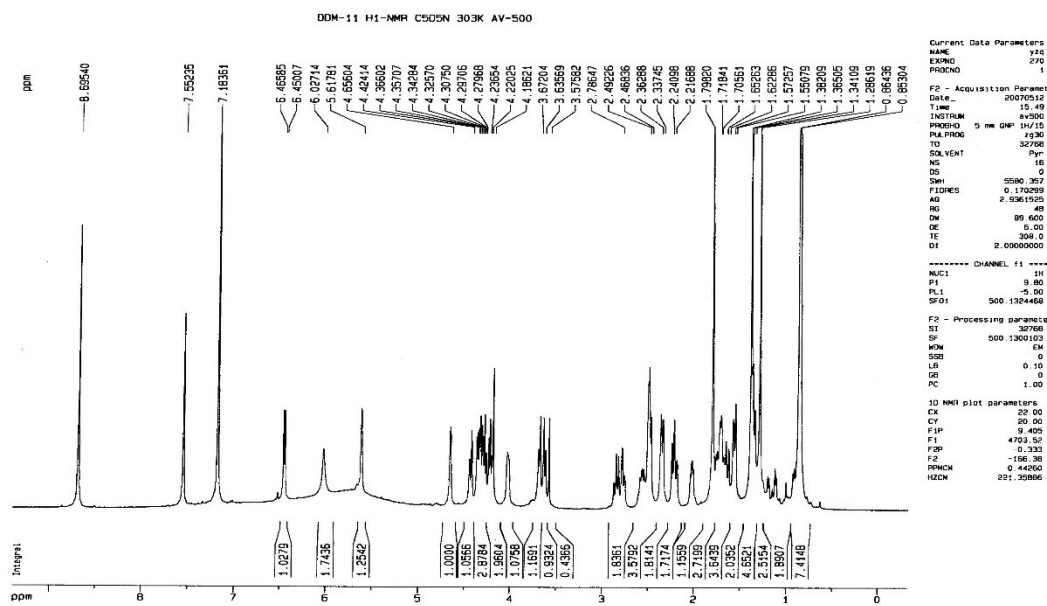

Figure S2. The  $^1\text{H}$  NMR Spectrum of **1** in  $\text{C}_5\text{D}_5\text{N}$  (500 MHz)

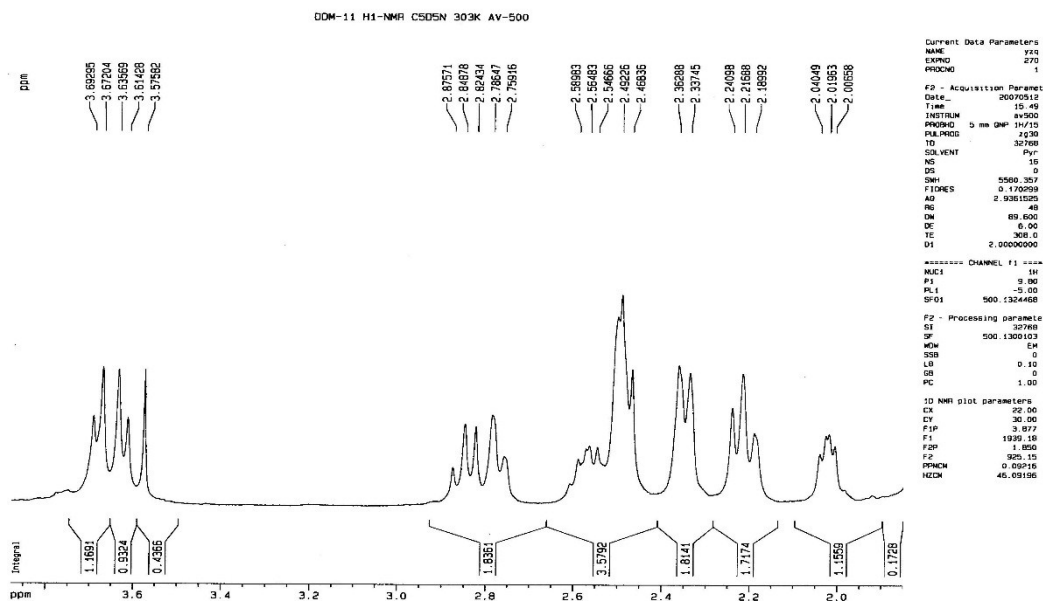

Figure S3. The  $^1\text{H}$  NMR Spectrum of **1** in  $\text{C}_5\text{D}_5\text{N}$  (500 MHz) (enlarged)

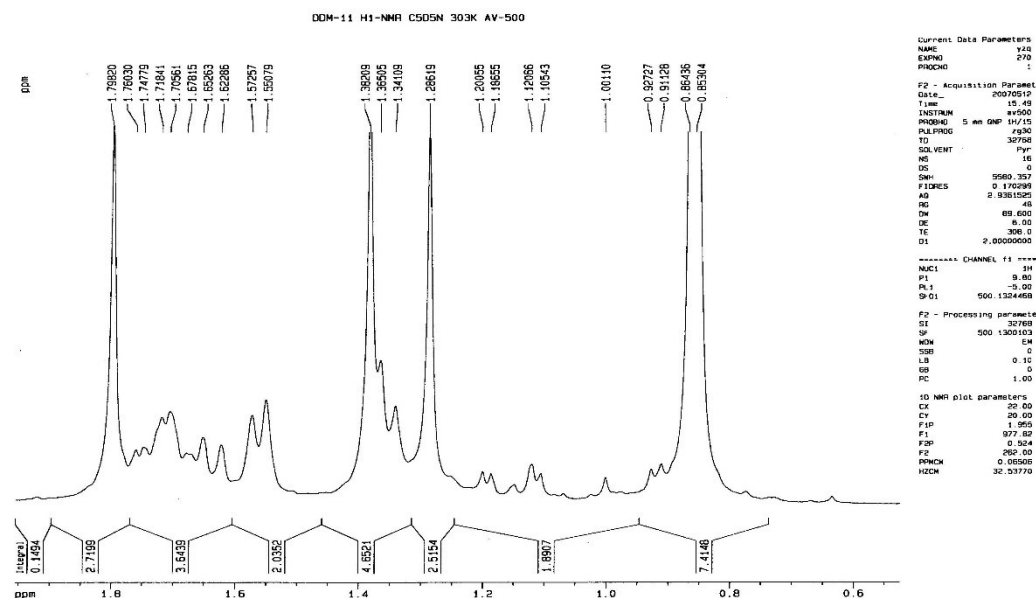

Figure S4. The  $^1\text{H}$  NMR Spectrum of **1** in  $\text{C}_5\text{D}_5\text{N}$  (500 MHz) (enlarged)

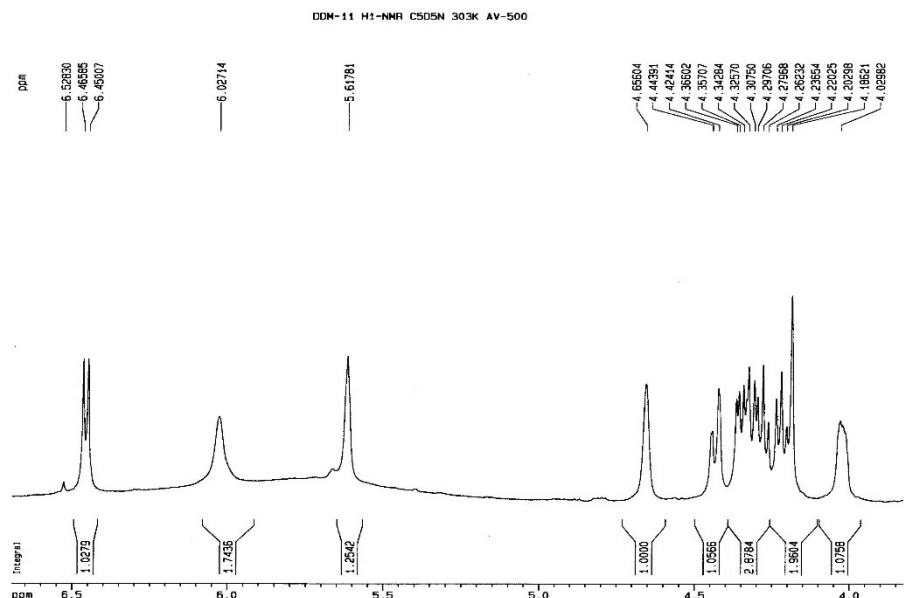

Figure S5. The  $^1\text{H}$  NMR Spectrum of **1** in  $\text{C}_5\text{D}_5\text{N}$  (500 MHz) (enlarged)

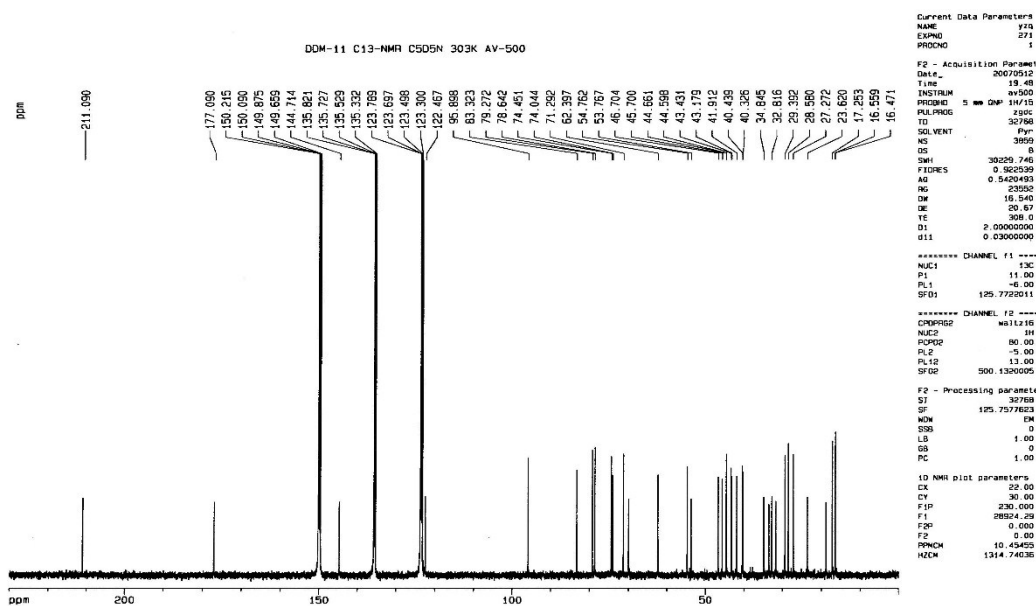

Figure S6. The  $^{13}\text{C}$  NMR Spectrum of **1** in  $\text{C}_5\text{D}_5\text{N}$  (125 MHz)

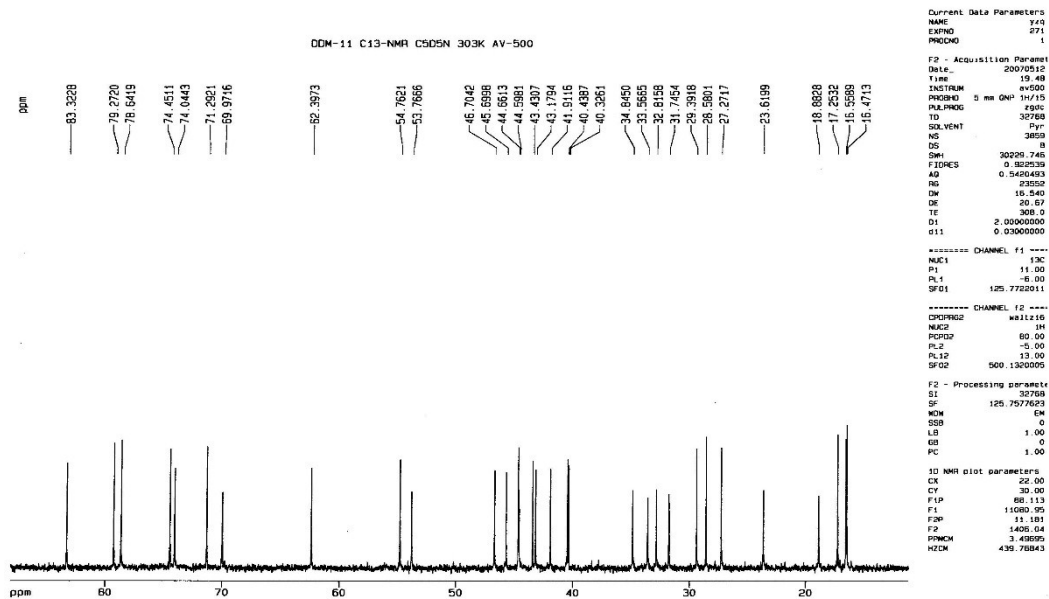

Figure S7. The  $^{13}\text{C}$  NMR Spectrum of **1** in  $\text{C}_5\text{D}_5\text{N}$  (125 MHz) (enlarged)

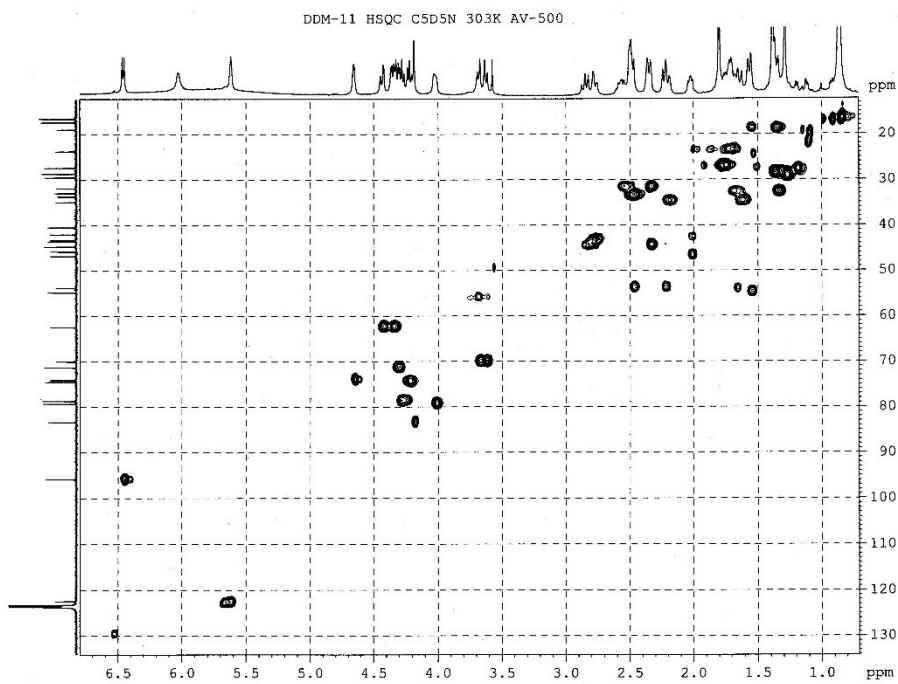

Figure S8. The HSQC Spectrum of **1** in  $\text{C}_5\text{D}_5\text{N}$

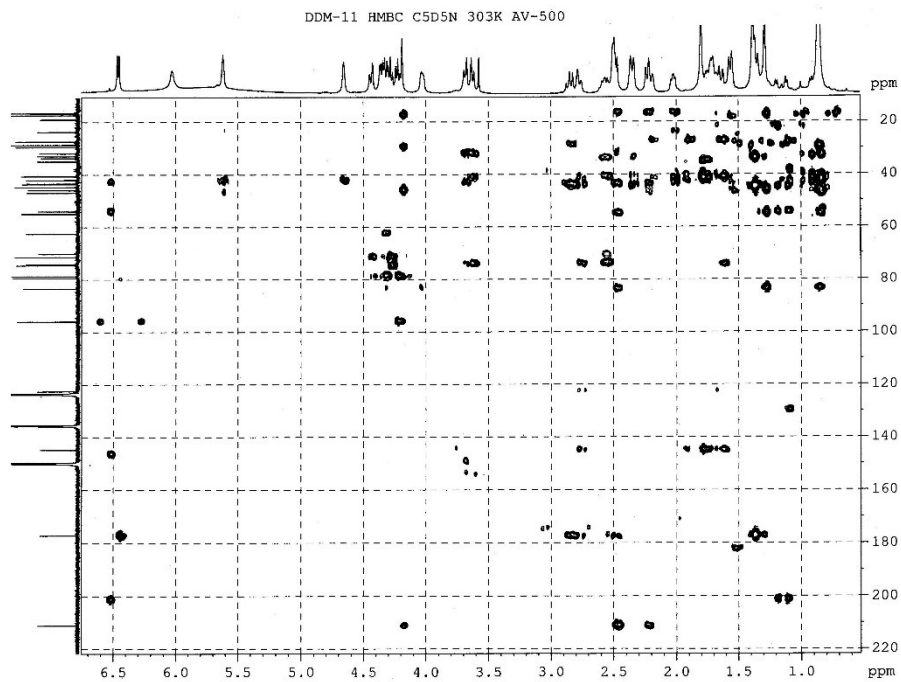

Figure S9. The HMBC Spectrum of **1** in  $C_5D_5N$

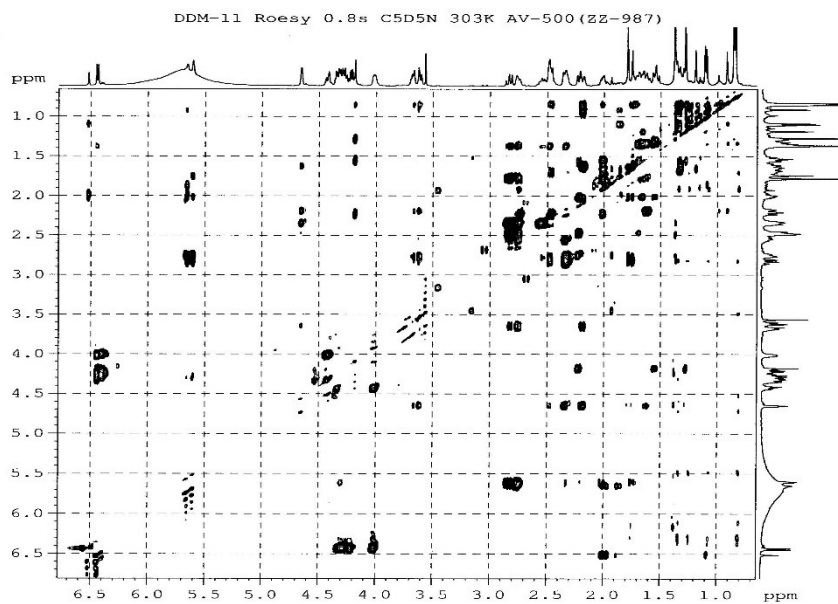

Figure S10. The ROESY Spectrum of **1** in  $C_5D_5N$



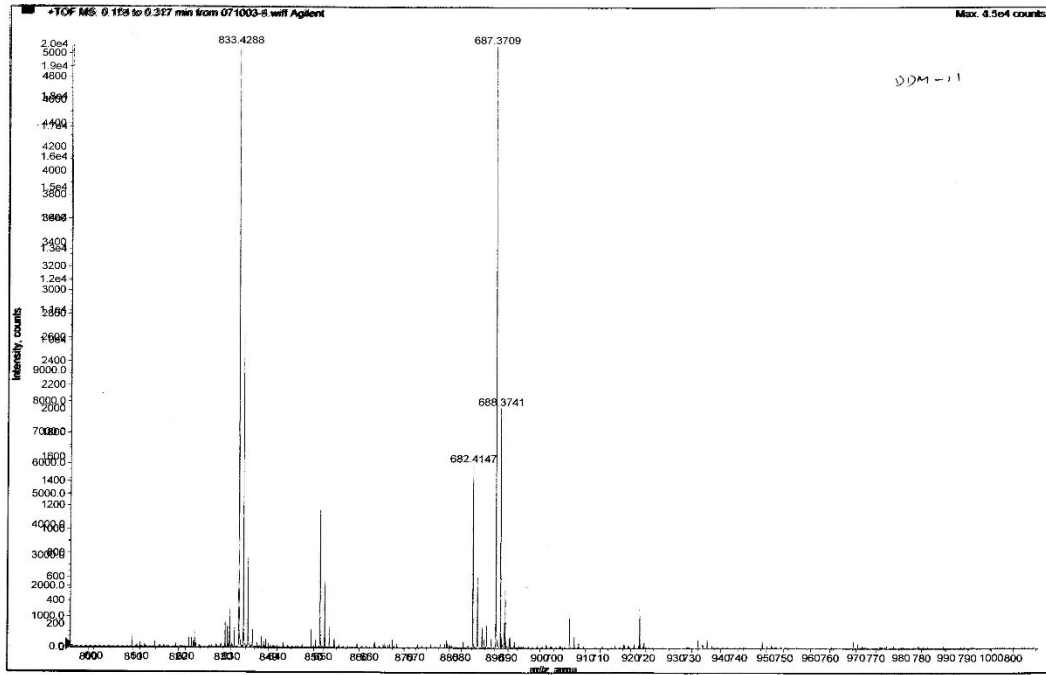

Figure S11. The HRESIMS Data of 1

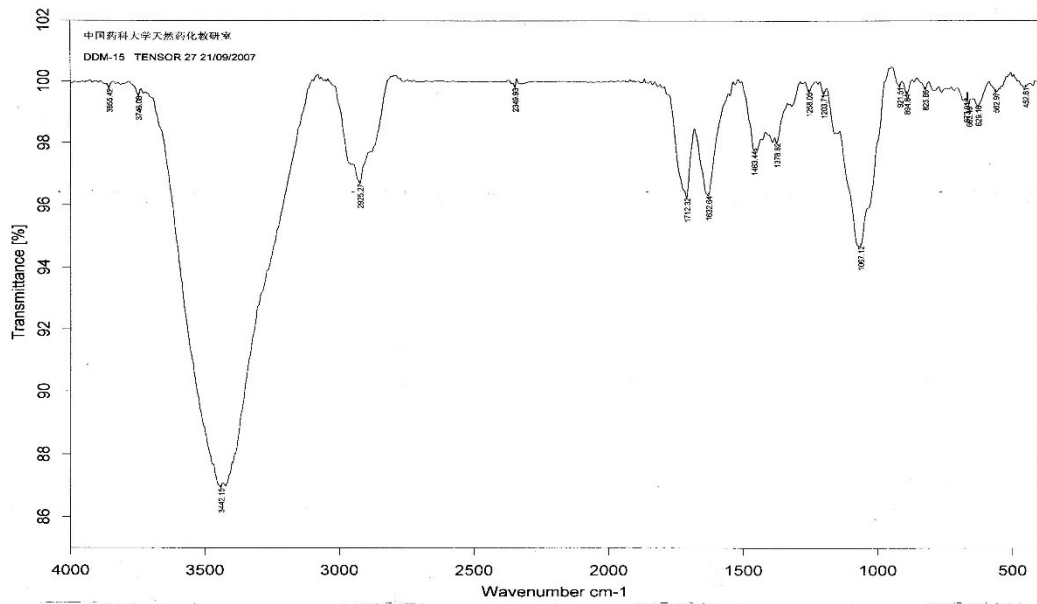

Figure S12. IR Spectrum of 2 (KBr)

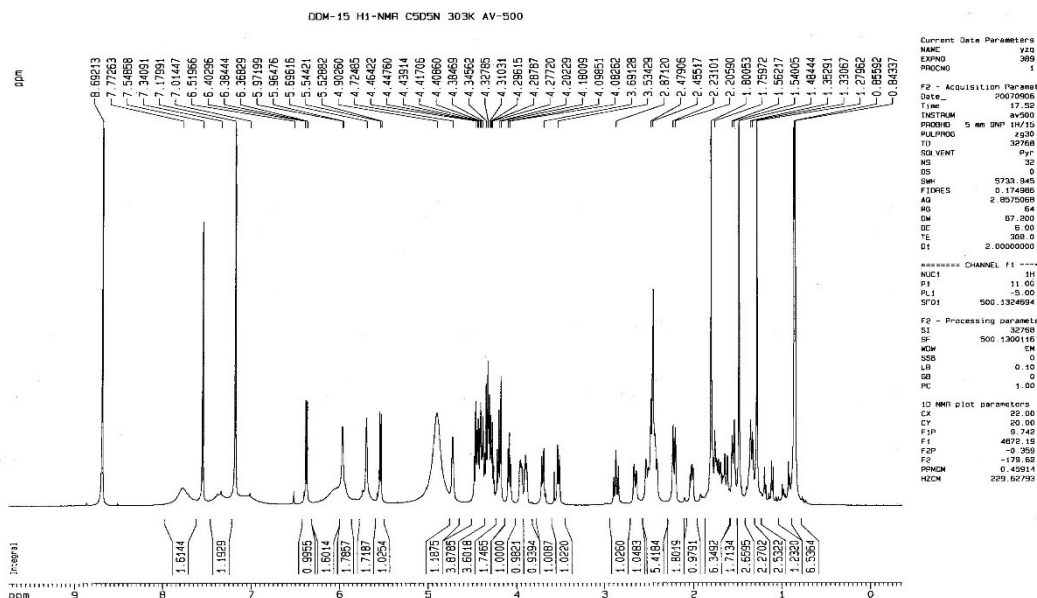

Figure S13. The  $^1\text{H}$  NMR Spectrum of **2** in  $\text{C}_5\text{D}_5\text{N}$  (500 MHz)

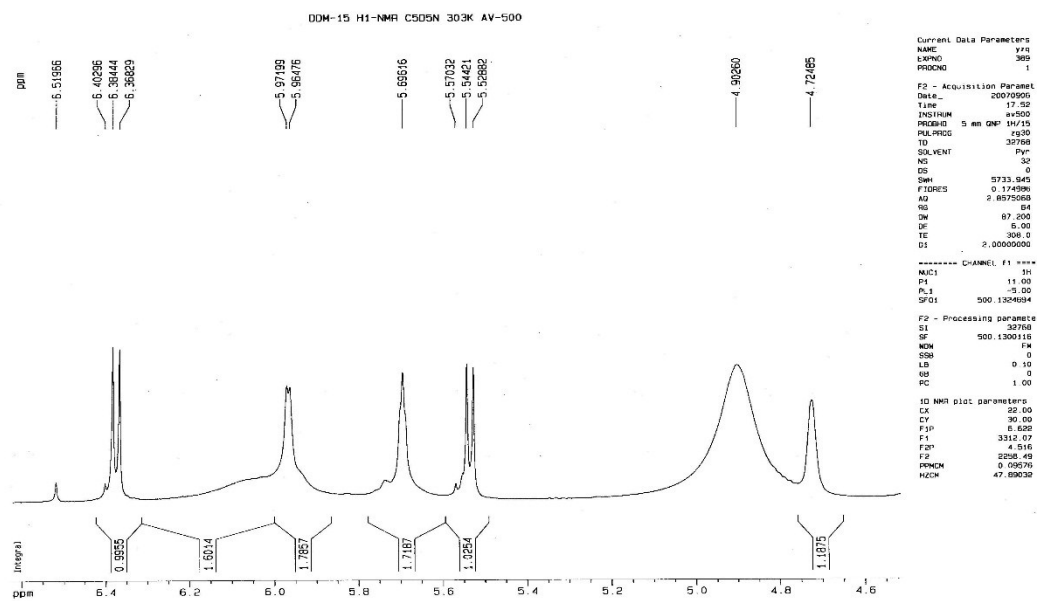

Figure S14. The  $^1\text{H}$  NMR Spectrum of **2** in  $\text{C}_5\text{D}_5\text{N}$  (500 MHz) (enlarged)

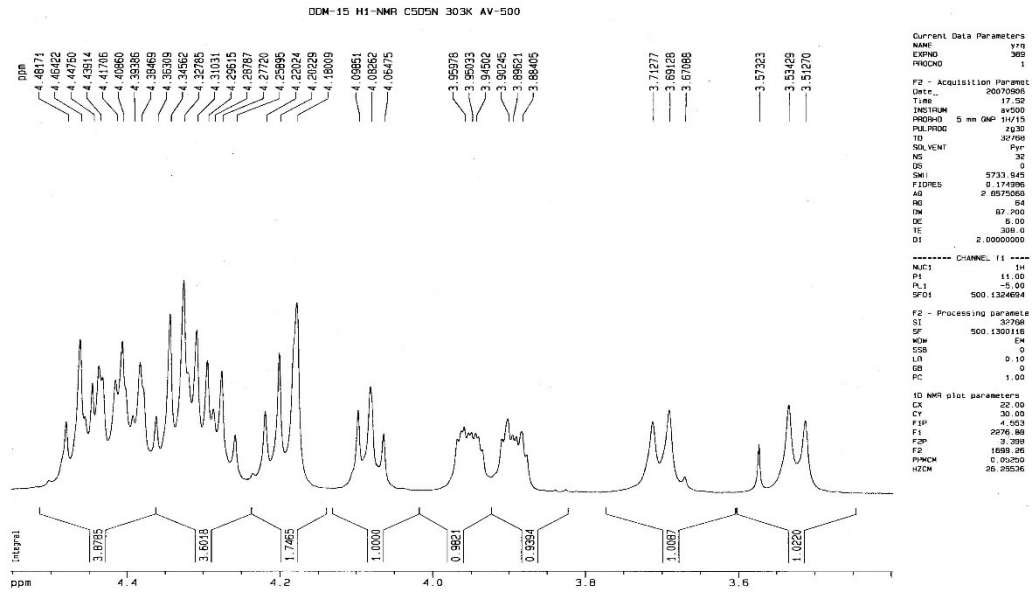

Figure S15. The  $^1\text{H}$  NMR Spectrum of **2** in  $\text{C}_5\text{D}_5\text{N}$  (500 MHz) (enlarged)

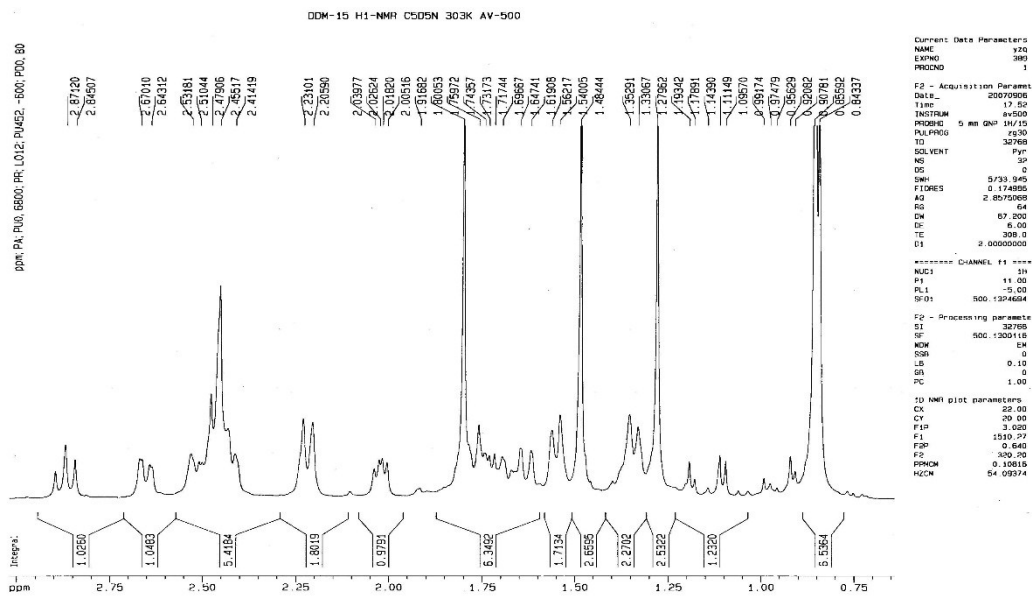

Figure S16. The  $^1\text{H}$  NMR Spectrum of **2** in  $\text{C}_5\text{D}_5\text{N}$  (500 MHz) (enlarged)

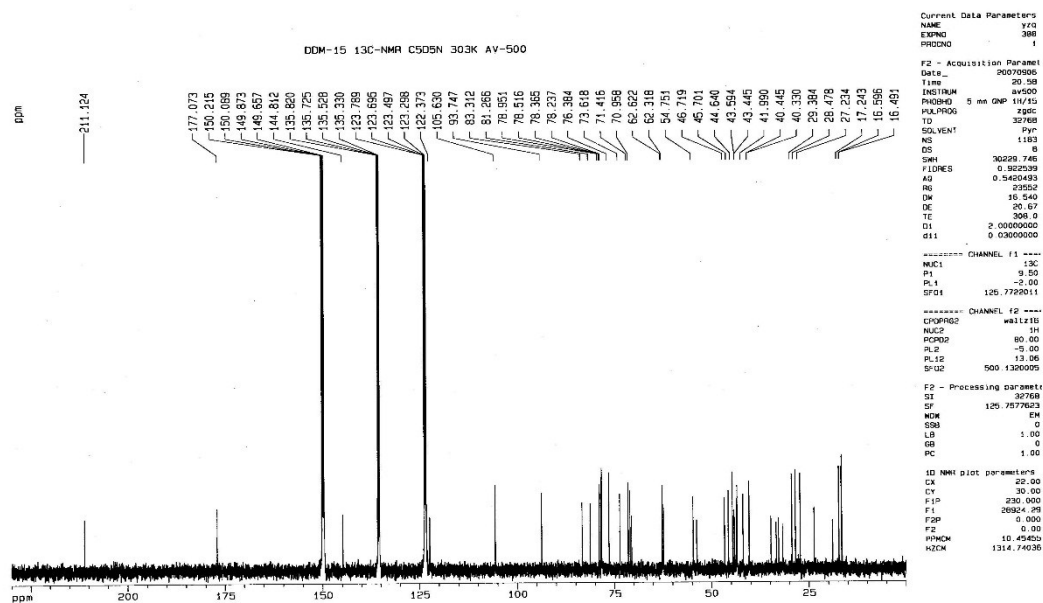

Figure S17. The  $^{13}\text{C}$  NMR Spectrum of **2** in  $\text{C}_5\text{D}_5\text{N}$  (125 MHz)

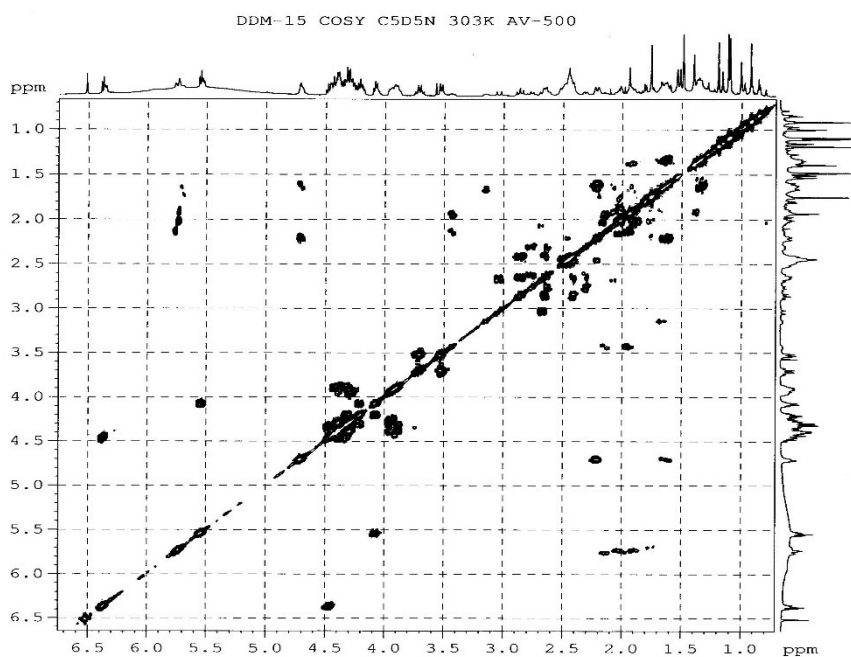

Figure S18. The  $^1\text{H}$ - $^1\text{H}$  COSY Spectrum of **2** in  $\text{C}_5\text{D}_5\text{N}$

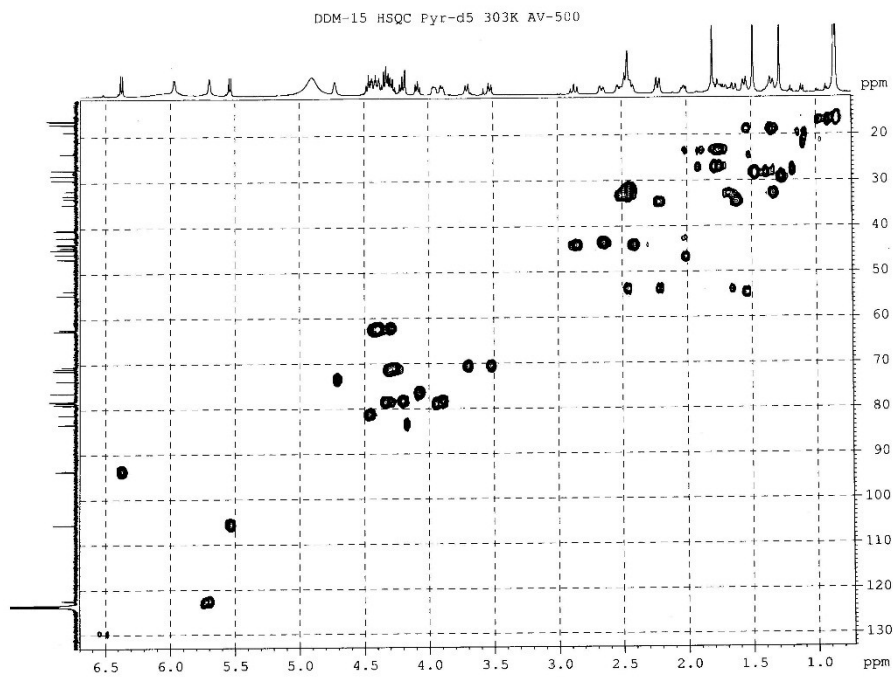

Figure S19. The HSQC Spectrum of **2** in  $C_5D_5N$

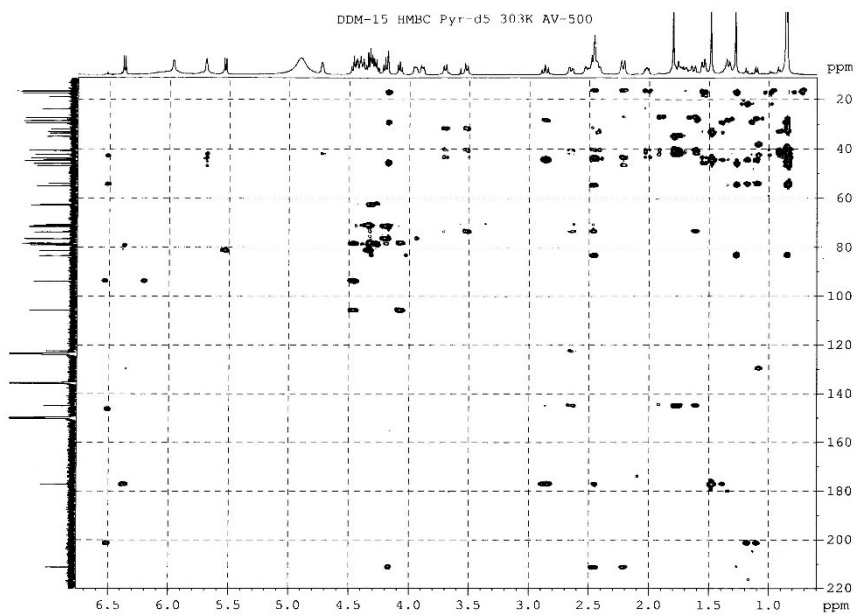

Figure S20. The HMBC Spectrum of **2** in  $C_5D_5N$

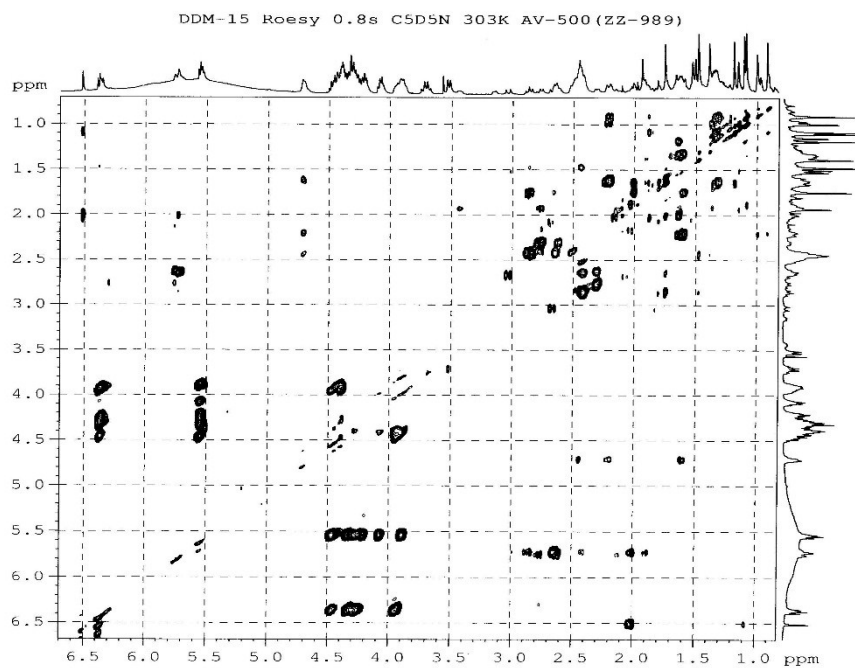

Figure S21. The ROESY Spectrum of **2** in C<sub>5</sub>D<sub>5</sub>N

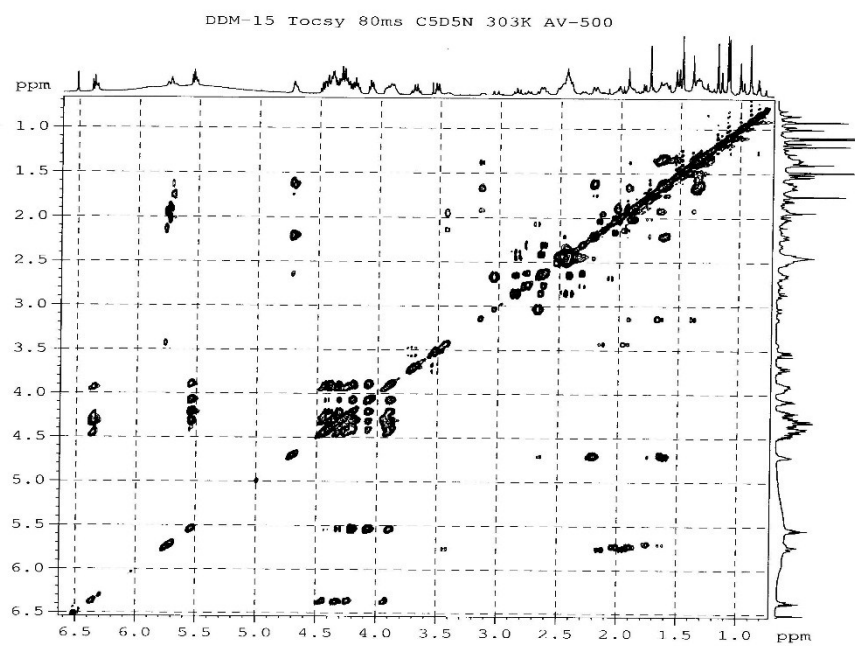

Figure S22. The TOCSY Spectrum of **2** in C<sub>5</sub>D<sub>5</sub>N

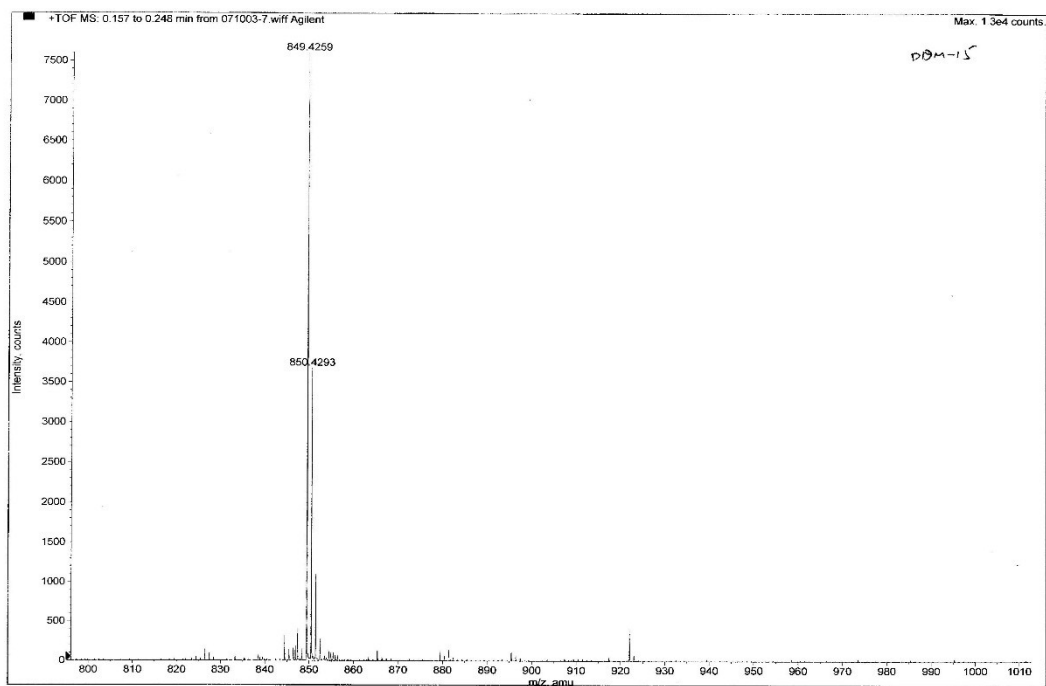

Figure S23. The HRESIMS Data of **2**

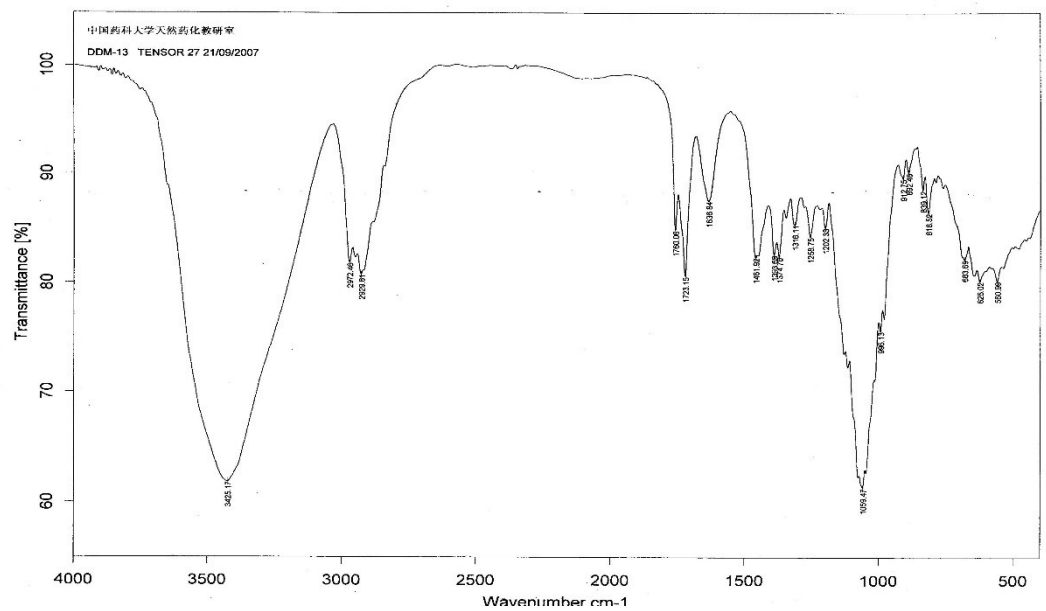

Figure S24. IR Spectrum of **3** (KBr)

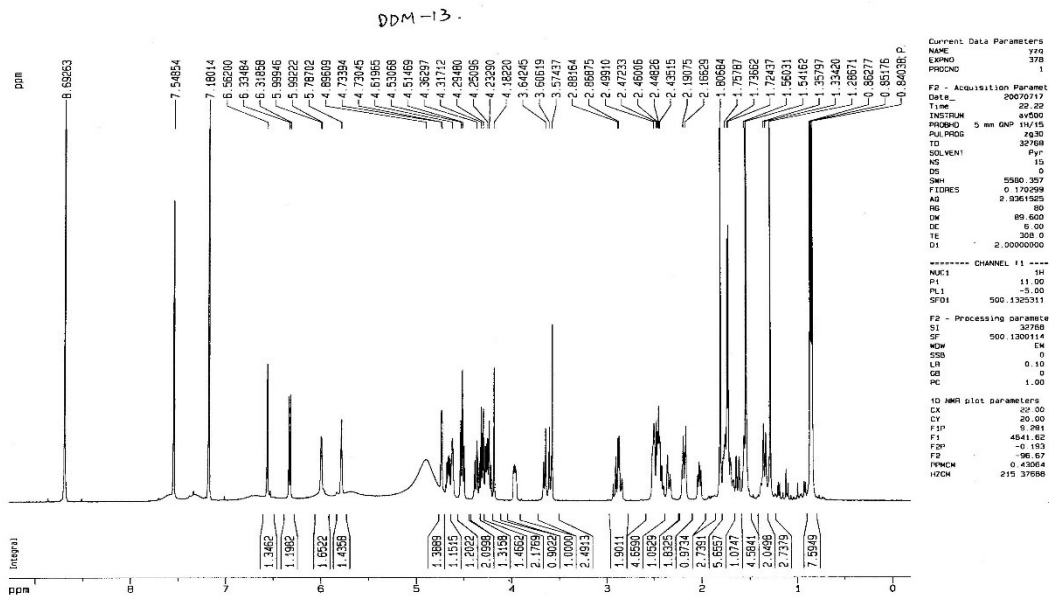

Figure S25. The  $^1\text{H}$  NMR Spectrum of **3** in  $\text{C}_5\text{D}_5\text{N}$  (500 MHz)

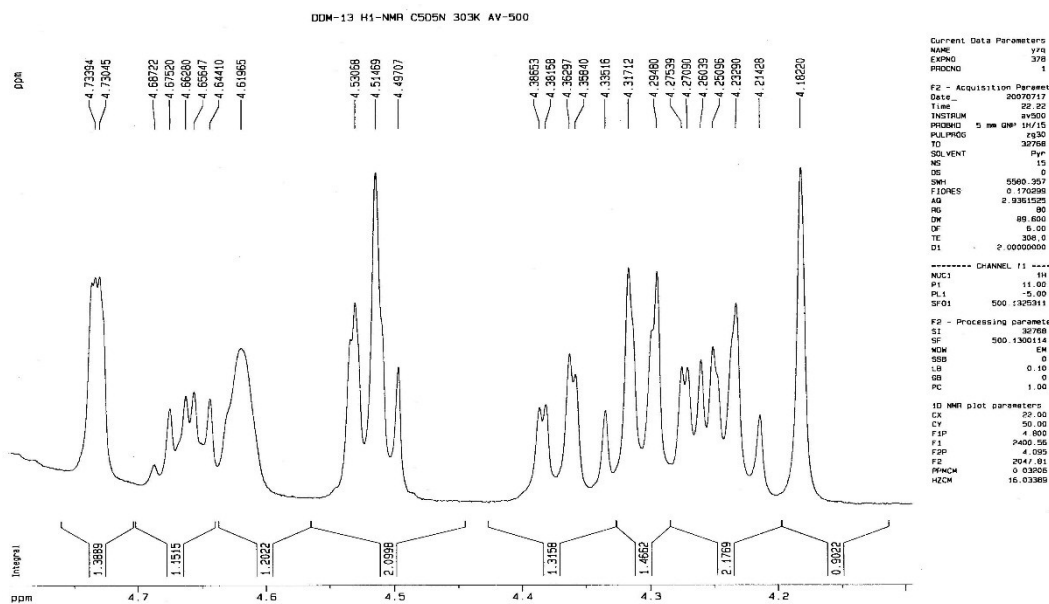

Figure S26. The  $^1\text{H}$  NMR Spectrum of **3** in  $\text{C}_5\text{D}_5\text{N}$  (500 MHz) (enlarged)



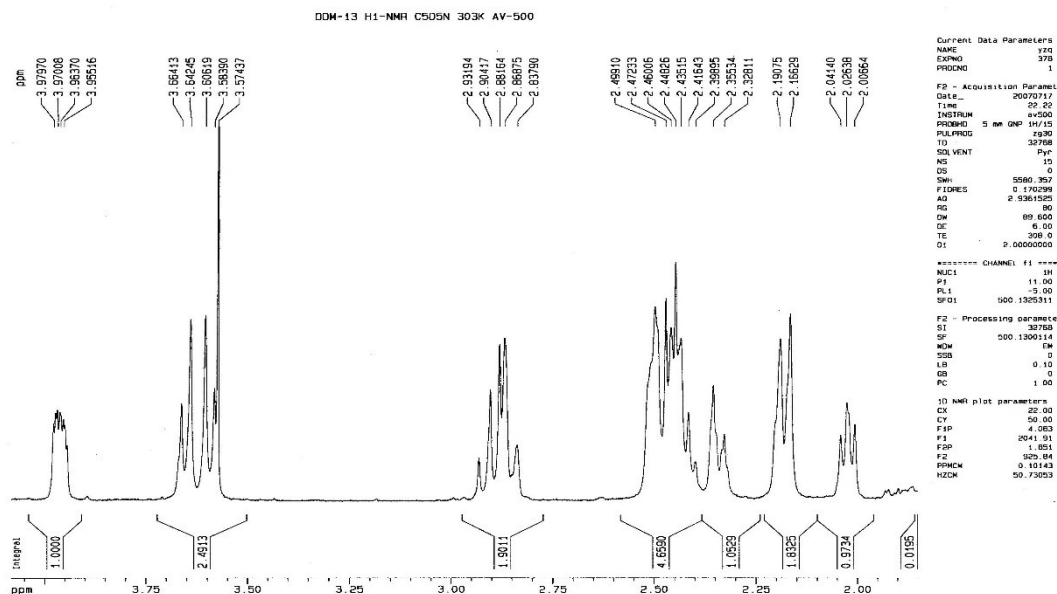

Figure S27. The  $^1\text{H}$  NMR Spectrum of **3** in  $\text{C}_5\text{D}_5\text{N}$  (500 MHz) (enlarged)

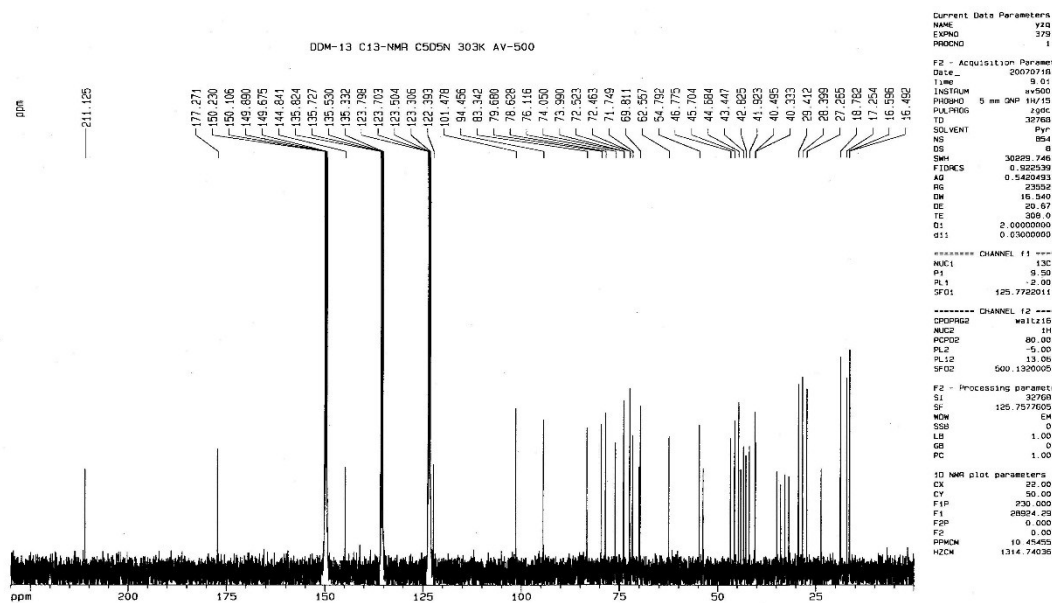

Figure S28. The  $^{13}\text{C}$  NMR Spectrum of **3** in  $\text{C}_5\text{D}_5\text{N}$  (125 MHz)

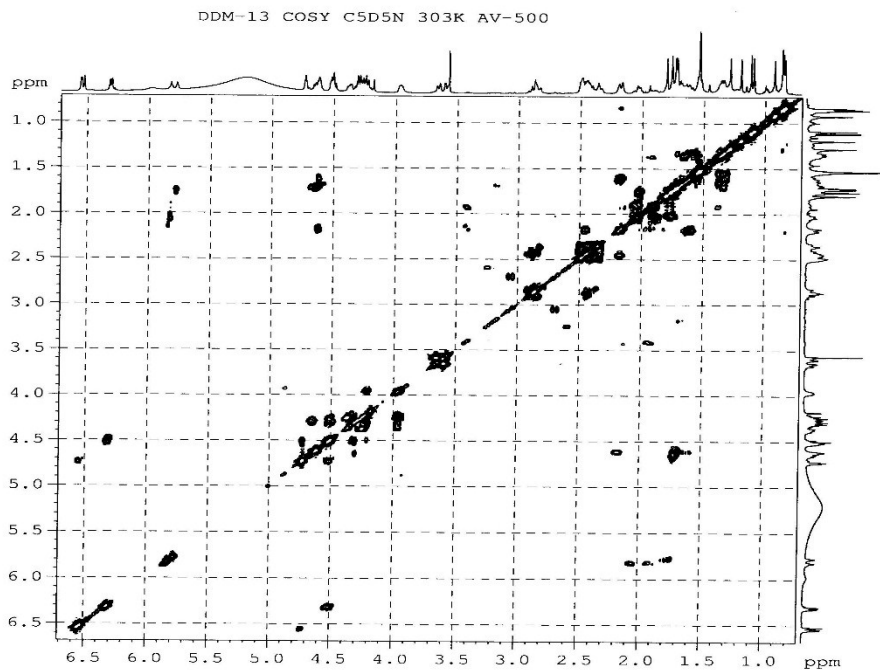

Figure S29. The  $^1\text{H}$ - $^1\text{H}$  COSY Spectrum of **3** in  $\text{C}_5\text{D}_5\text{N}$

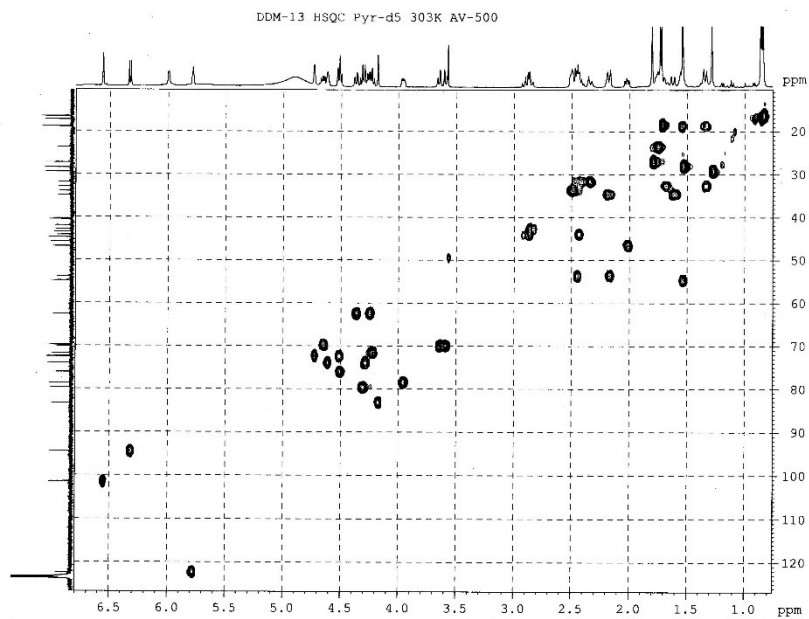

Figure S30. The HSQC Spectrum of **3** in  $\text{C}_5\text{D}_5\text{N}$

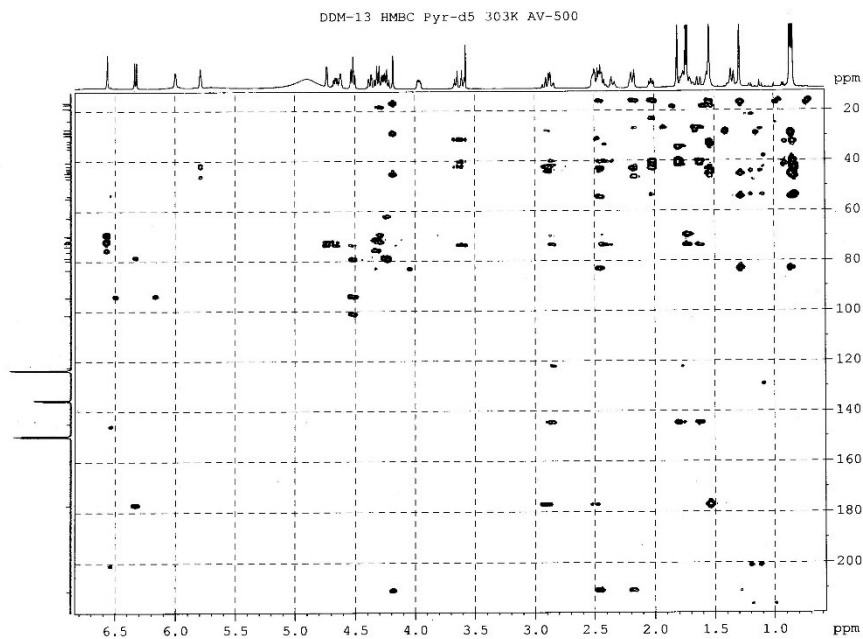

Figure S31. The HMBC Spectrum of **3** in  $C_5D_5N$

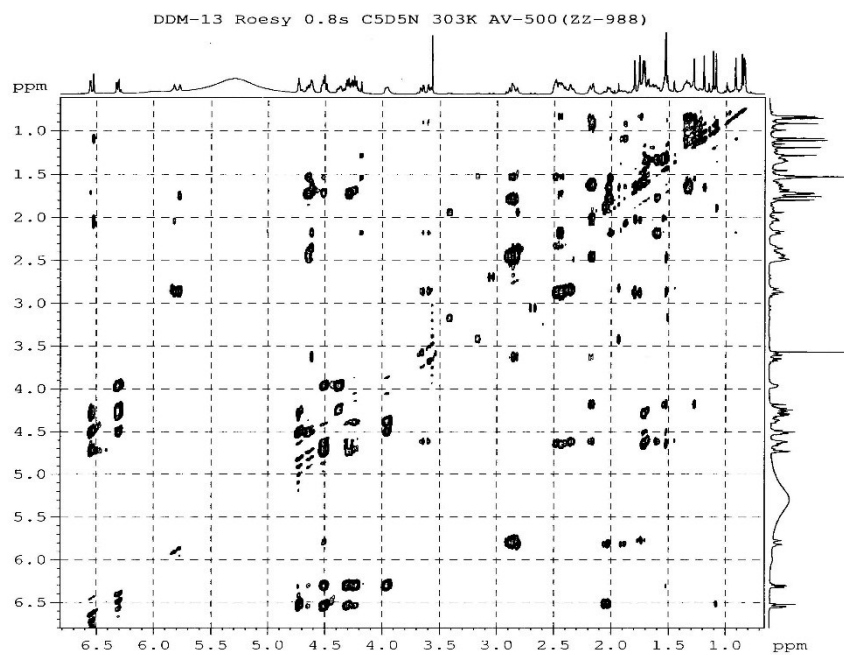

Figure S32. The ROESY Spectrum of **3** in  $C_5D_5N$

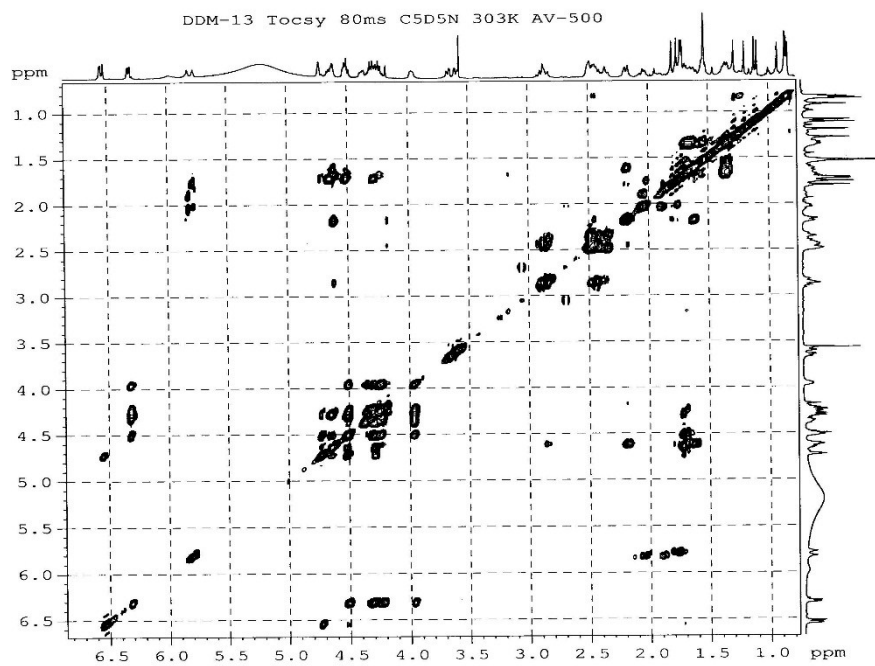

Figure S33. The TOCSY Spectrum of **3** in C<sub>5</sub>D<sub>5</sub>N

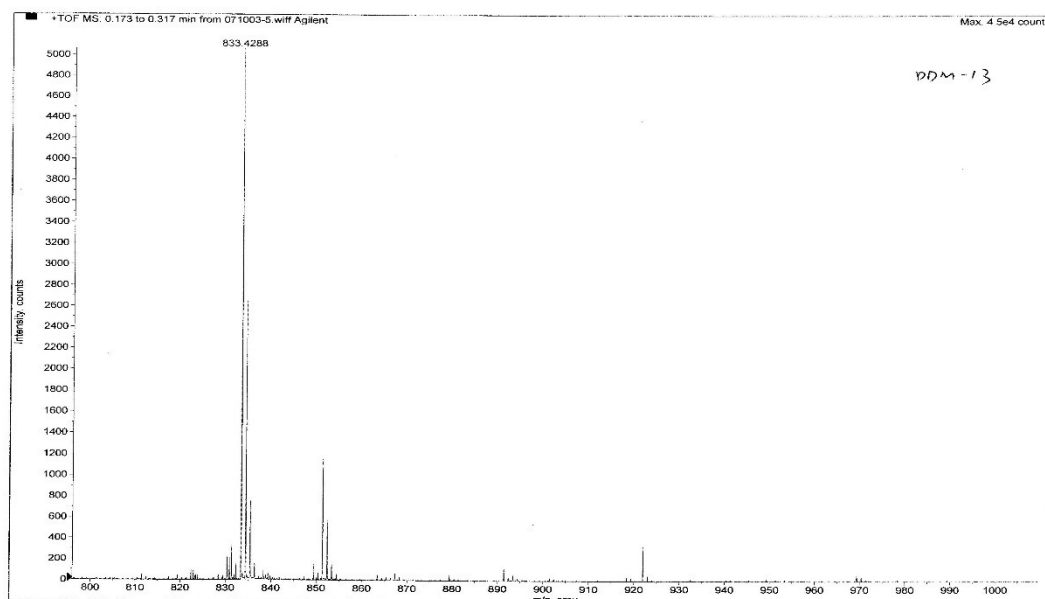

Figure S34. The HRESIMS Data of **3**

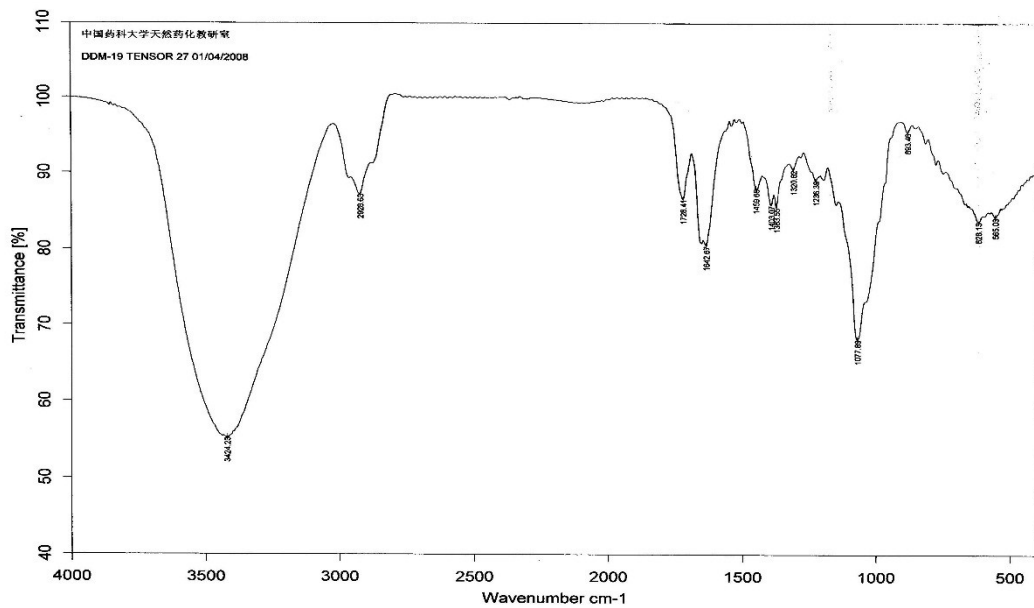

Figure S35. IR Spectrum of 4 (KBr)

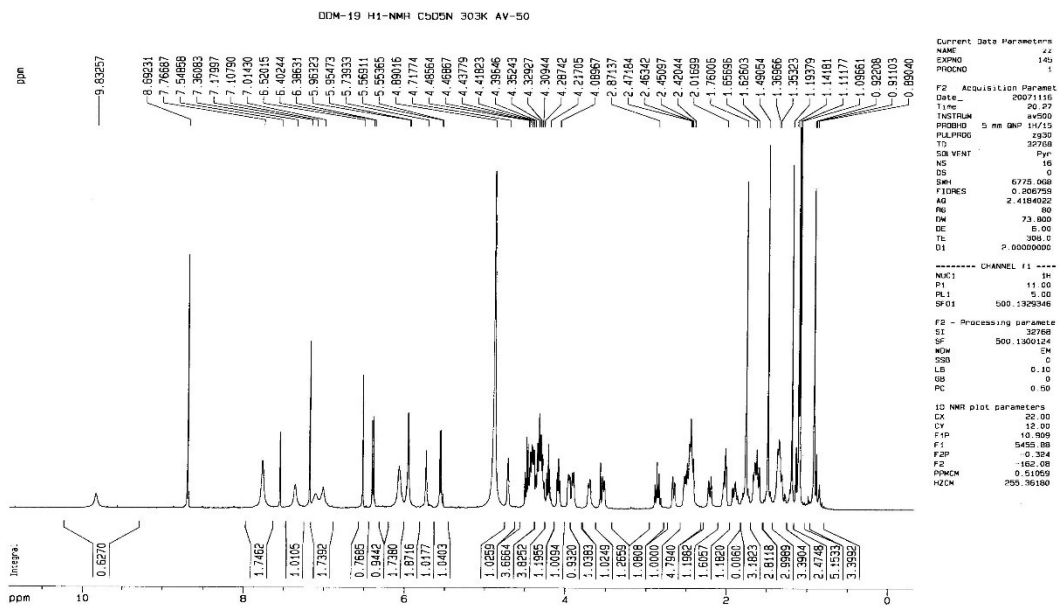

Figure S36. The  $^1\text{H}$  NMR Spectrum of 4 in  $\text{C}_5\text{D}_5\text{N}$  (500 MHz)

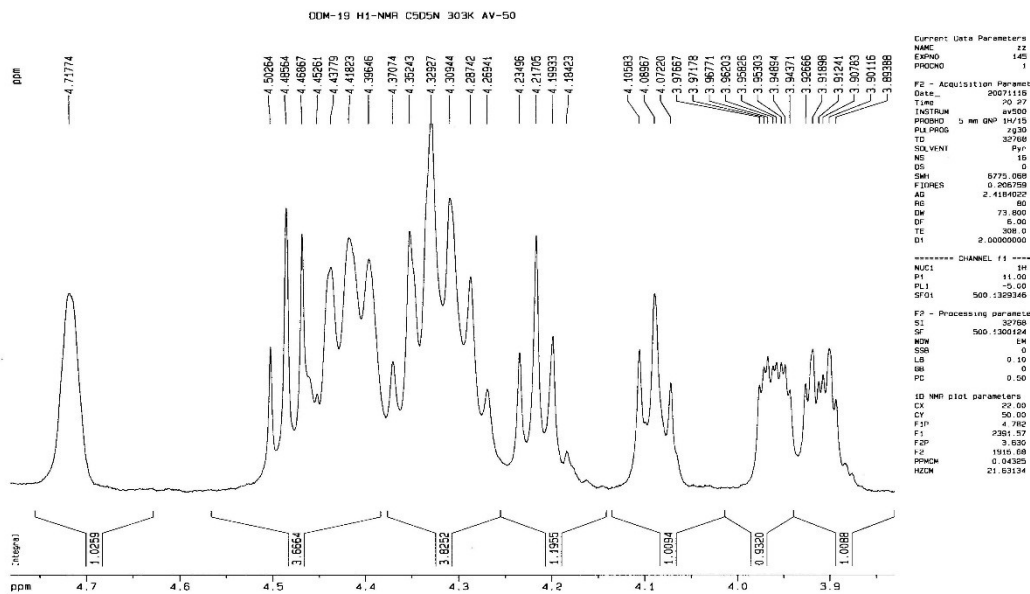

Figure S37. The  $^1\text{H}$  NMR Spectrum of **4** in  $\text{C}_5\text{D}_5\text{N}$  (500 MHz) (enlarged)

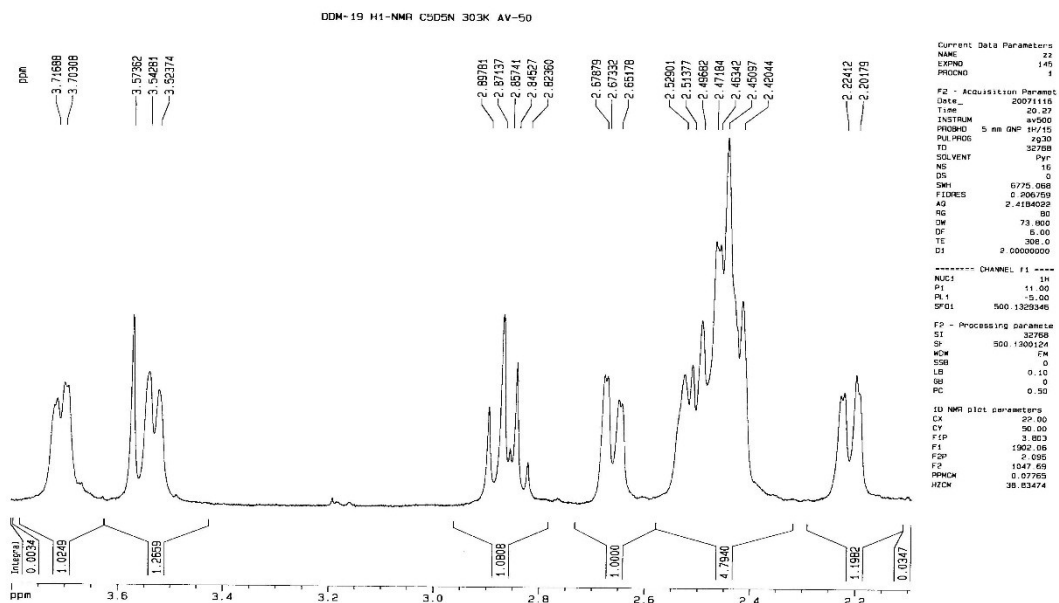

Figure S38. The  $^1\text{H}$  NMR Spectrum of **4** in  $\text{C}_5\text{D}_5\text{N}$  (500 MHz) (enlarged)

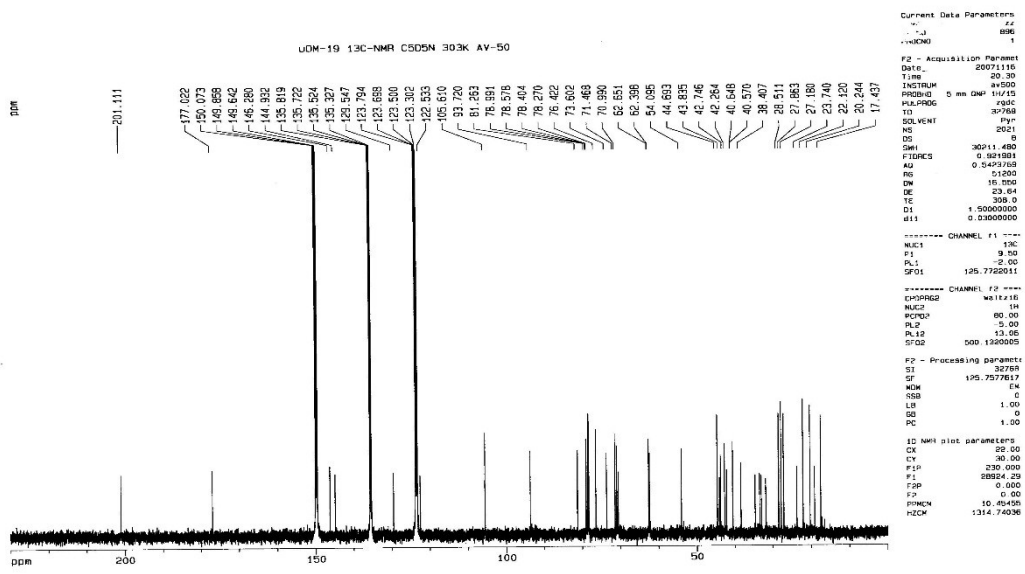

Figure S39. The  $^{13}\text{C}$  NMR Spectrum of **4** in  $\text{C}_5\text{D}_5\text{N}$  (125 MHz)

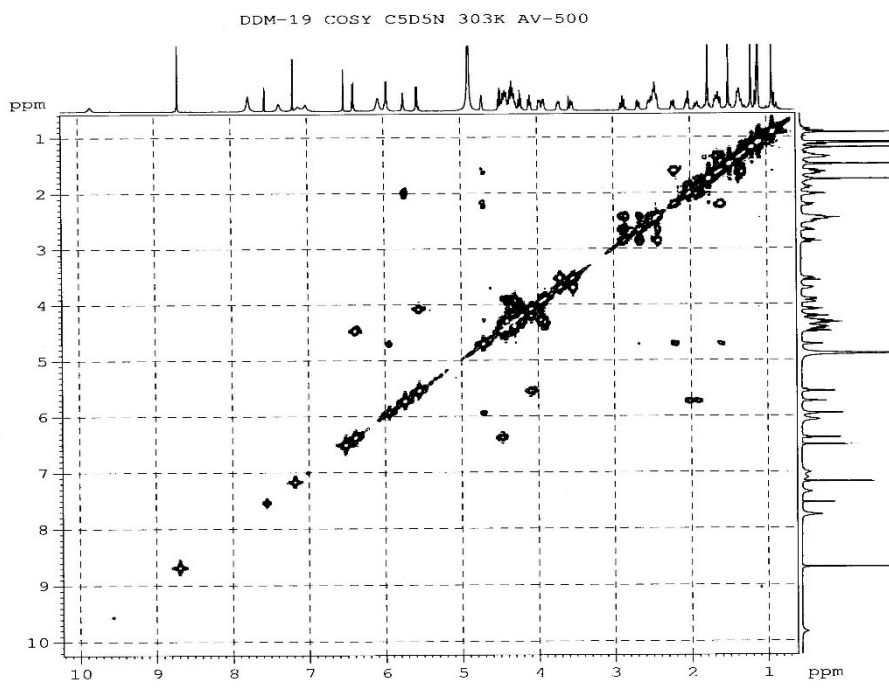

Figure S40. The  $^1\text{H}$ - $^1\text{H}$  COSY Spectrum of **4** in  $\text{C}_5\text{D}_5\text{N}$

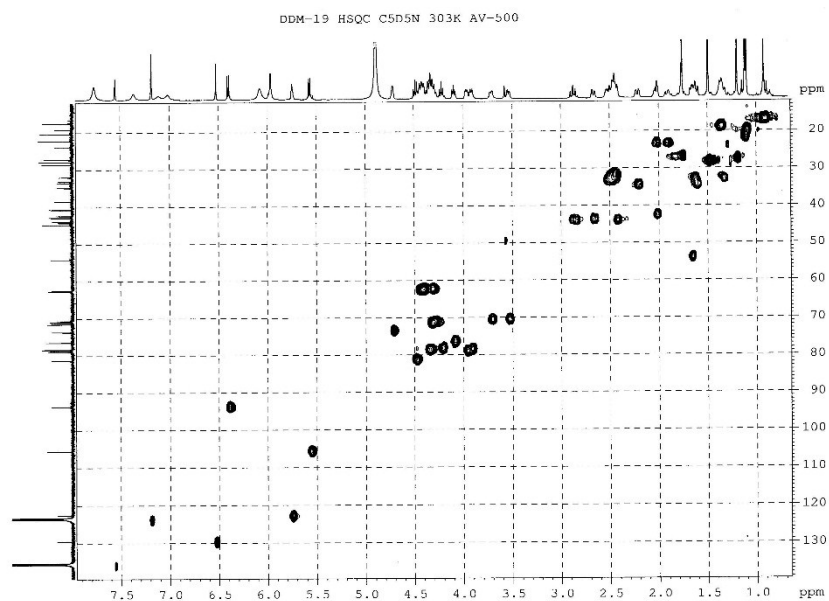

Figure S41. The HSQC Spectrum of **4** in  $C_5D_5N$

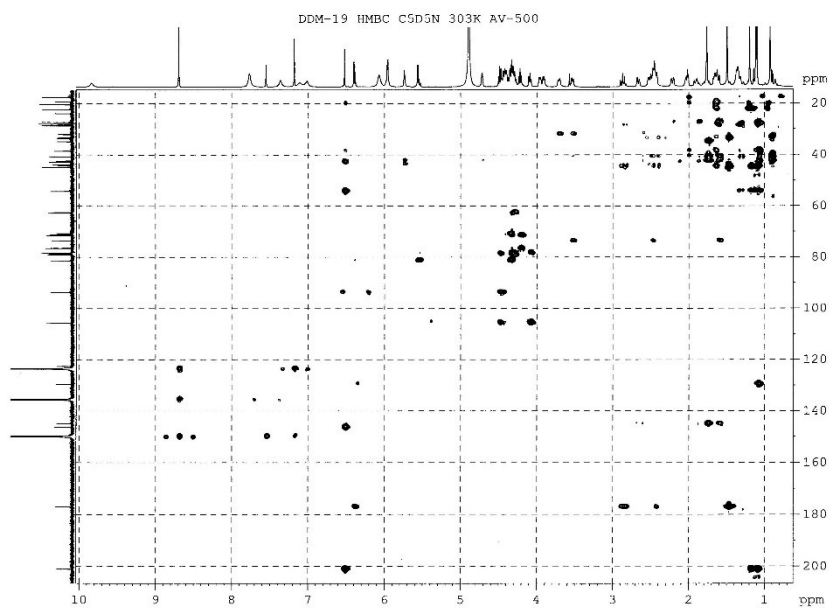

Figure S42. The HMBC Spectrum of **4** in  $C_5D_5N$



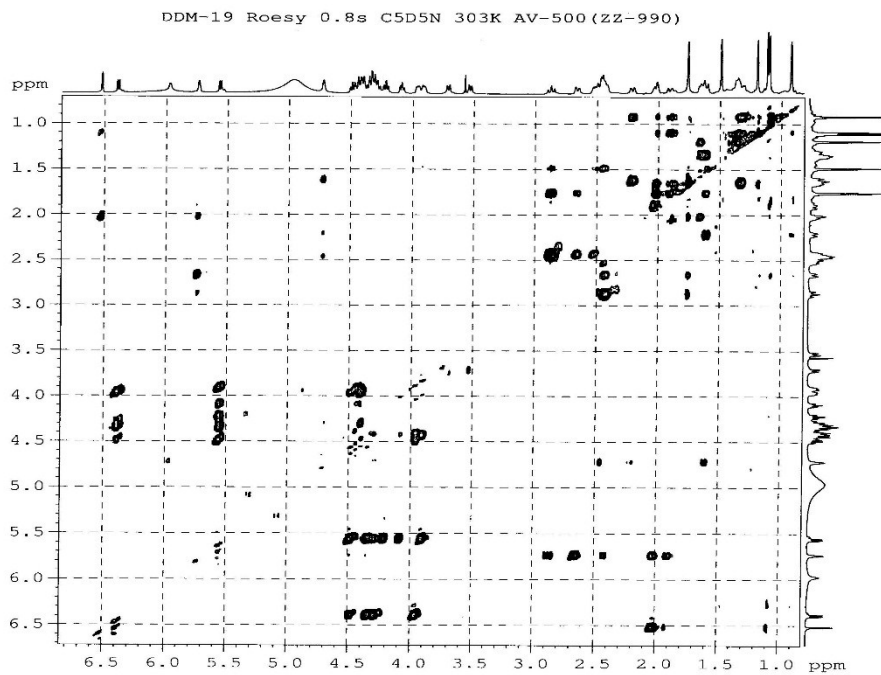

Figure S43. The ROESY Spectrum of **4** in C<sub>5</sub>D<sub>5</sub>N

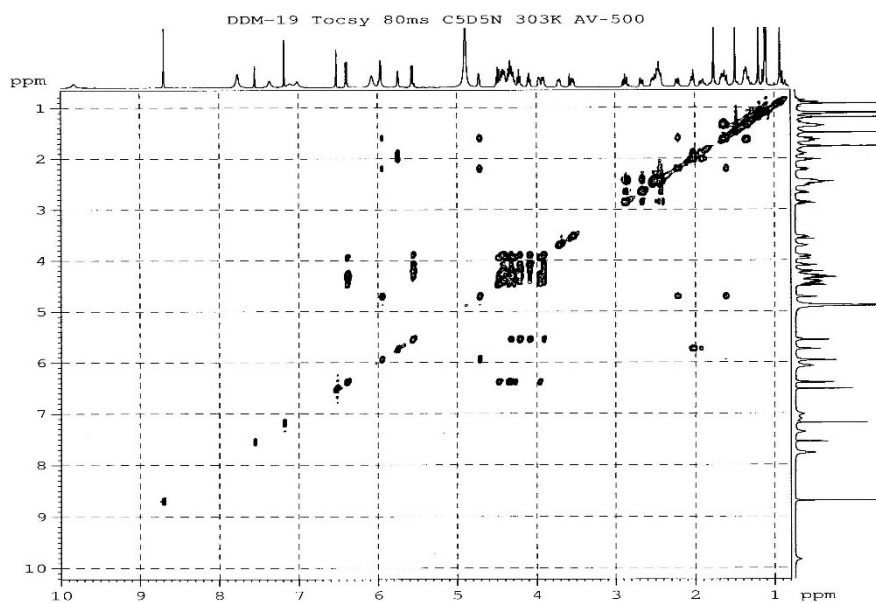

Figure S44. The TOCSY Spectrum of **4** in C<sub>5</sub>D<sub>5</sub>N

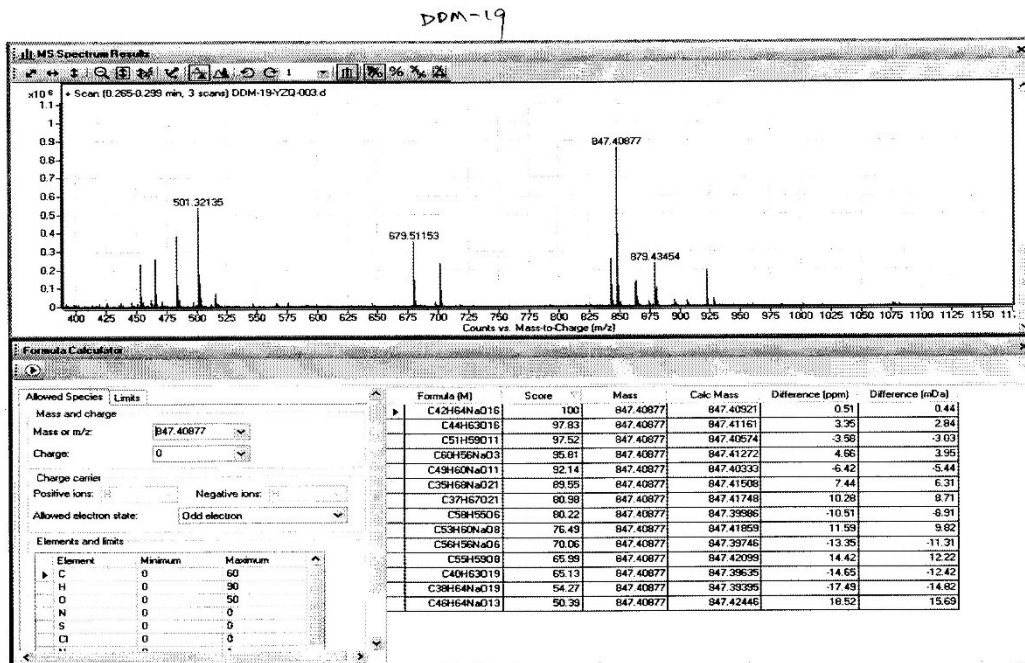

Figure S45. The HRESIMS Data of 4

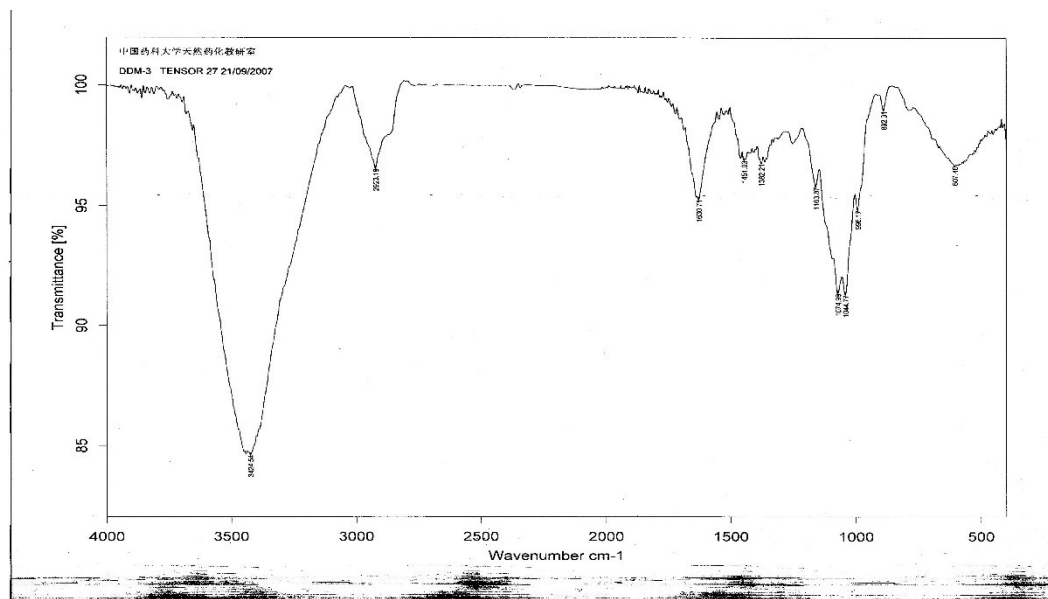

Figure S46. IR Spectrum of 5 (KBr)

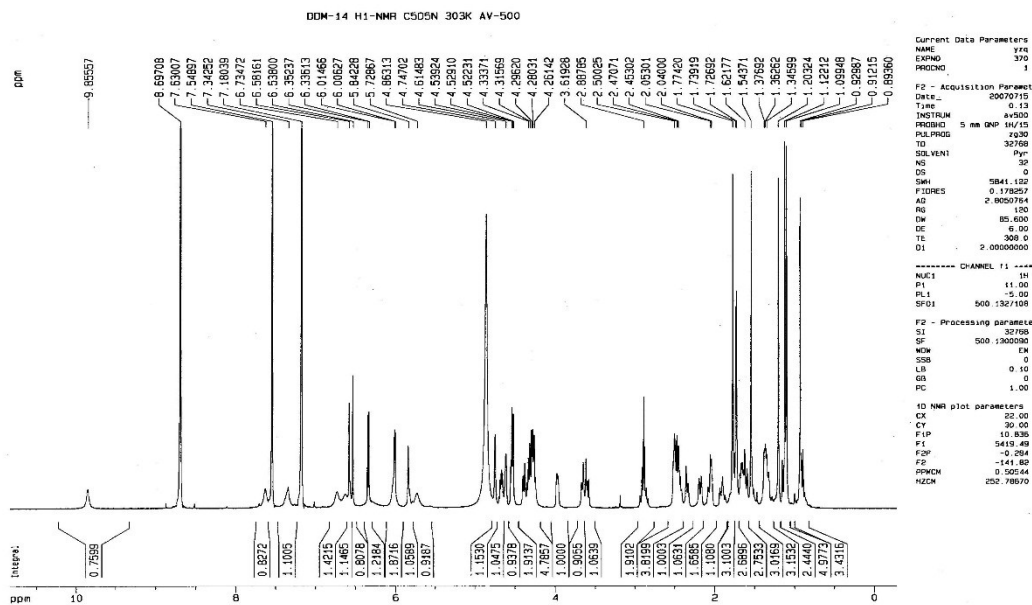

Figure S47. The  $^1\text{H}$  NMR Spectrum of **5** in  $\text{C}_5\text{D}_5\text{N}$  (500 MHz)

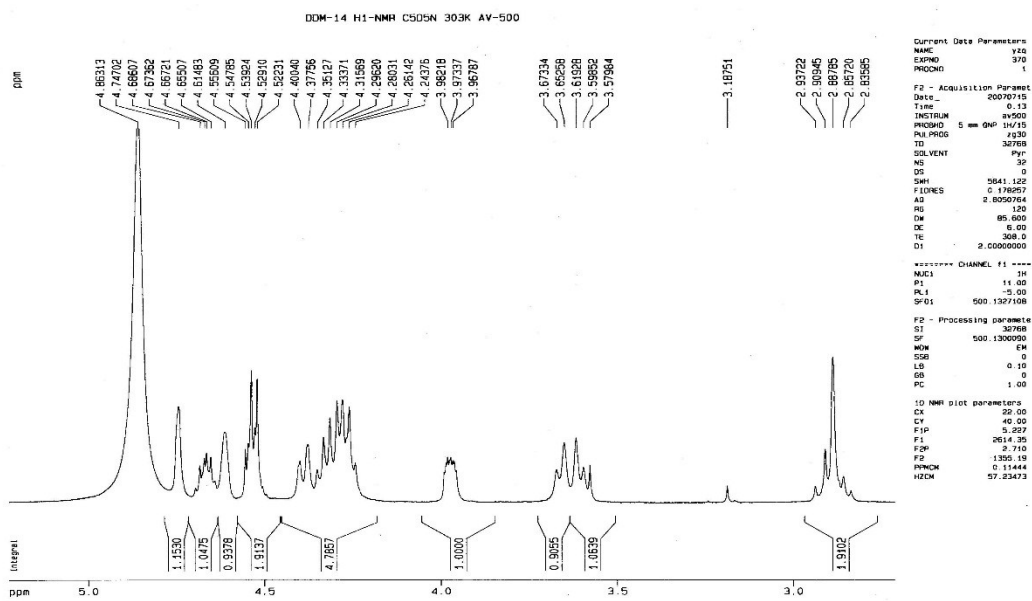

Figure S48. The  $^1\text{H}$  NMR Spectrum of **5** in  $\text{C}_5\text{D}_5\text{N}$  (500 MHz) (enlarged)

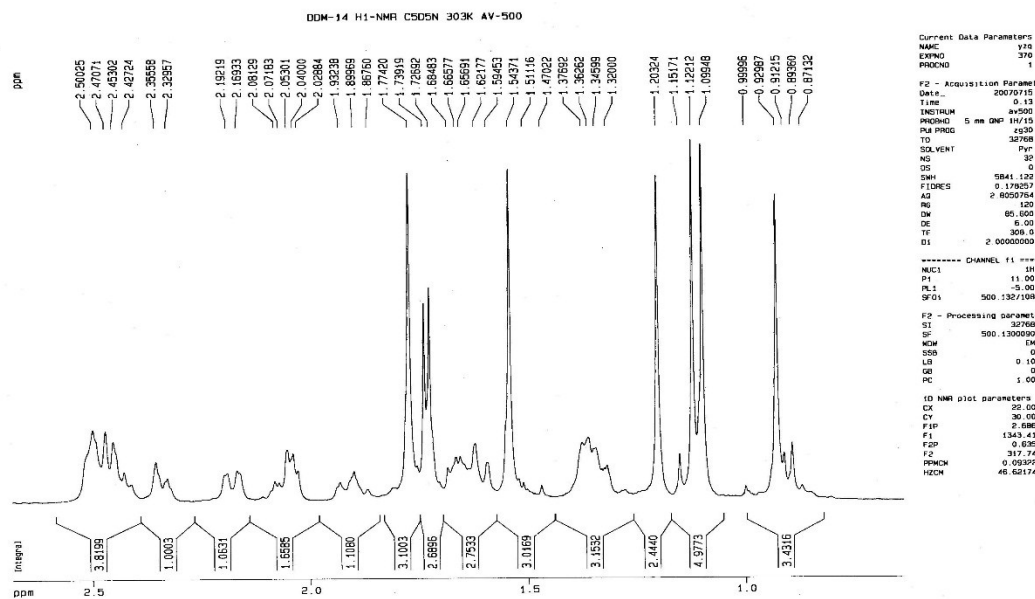

Figure S49. The  $^1\text{H}$  NMR Spectrum of **5** in  $\text{C}_5\text{D}_5\text{N}$  (500 MHz) (enlarged)

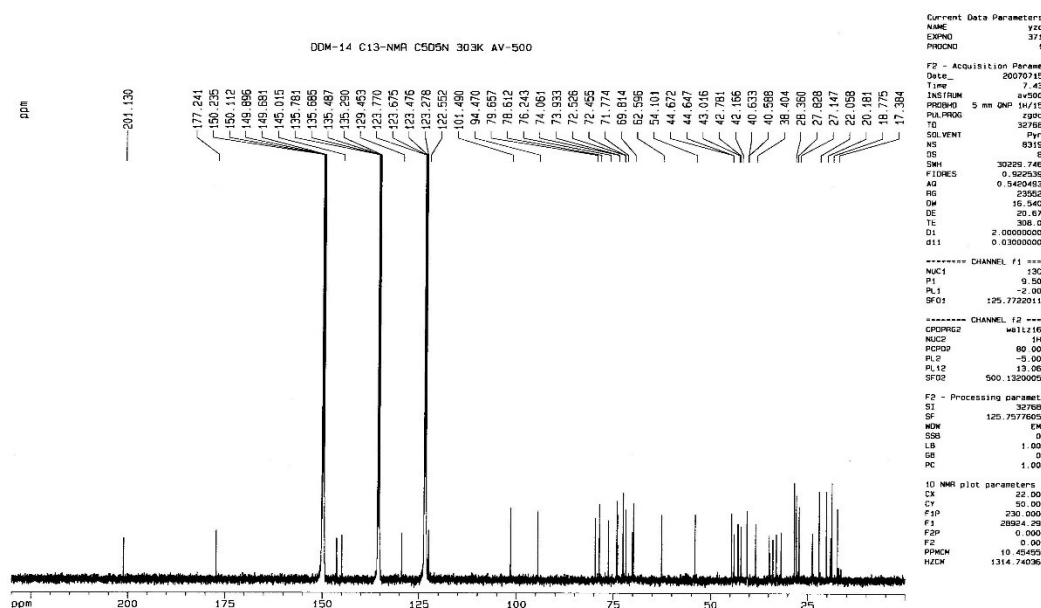

Figure S50. The  $^{13}\text{C}$  NMR Spectrum of **5** in  $\text{C}_5\text{D}_5\text{N}$  (125 MHz)

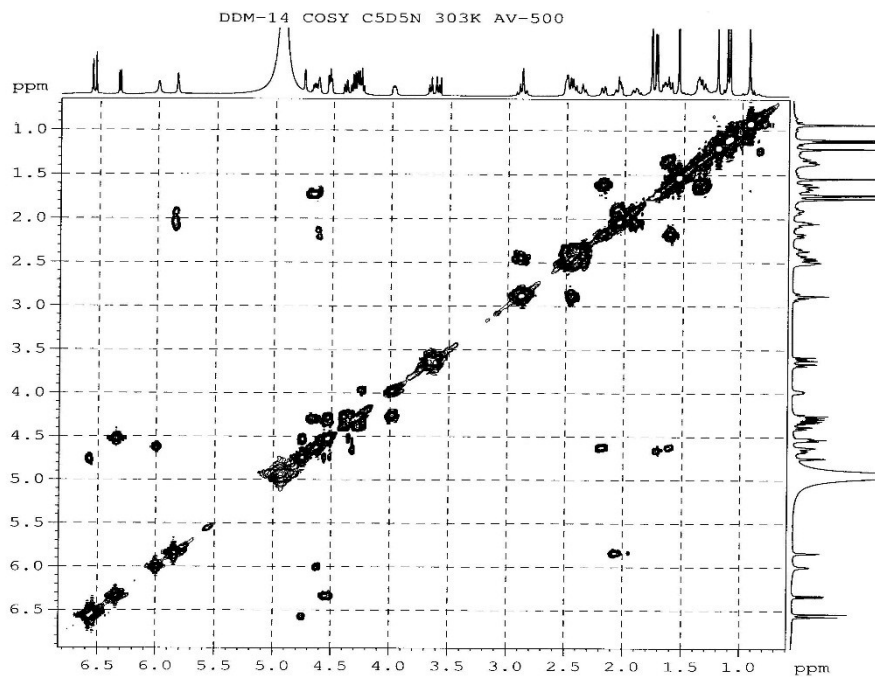

Figure S51. The  $^1\text{H}$ - $^1\text{H}$  COSY Spectrum of **5** in  $\text{C}_5\text{D}_5\text{N}$

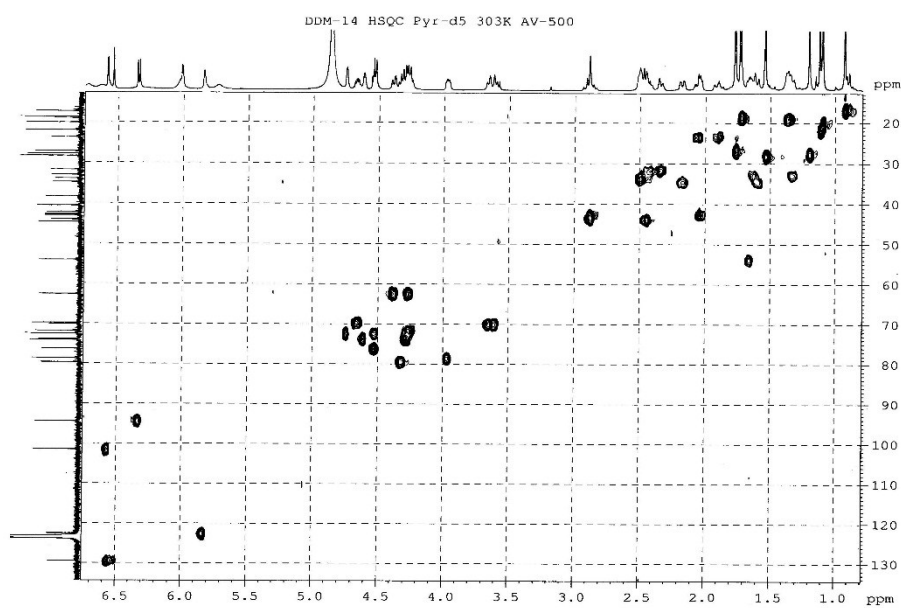

Figure S52. The HSQC Spectrum of **5** in  $\text{C}_5\text{D}_5\text{N}$

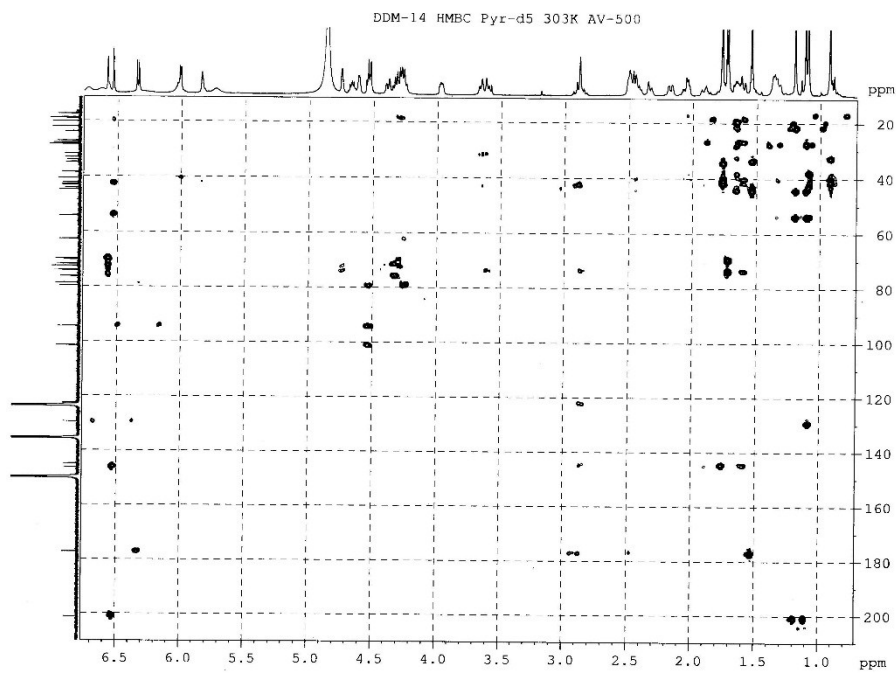

Figure S53. The HMBC Spectrum of **5** in  $C_5D_5N$

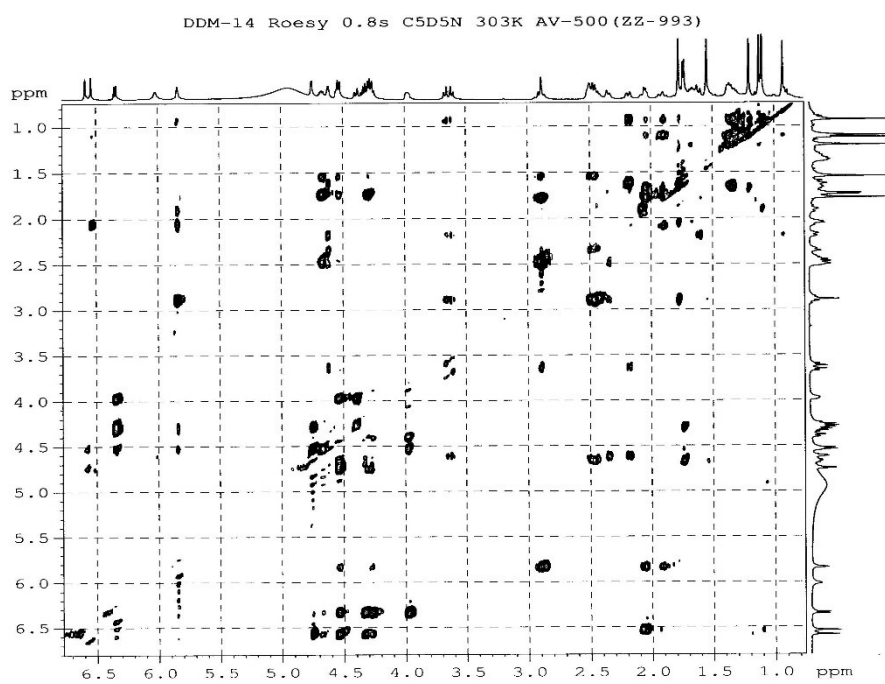

Figure S54. The ROESY Spectrum of **5** in  $C_5D_5N$

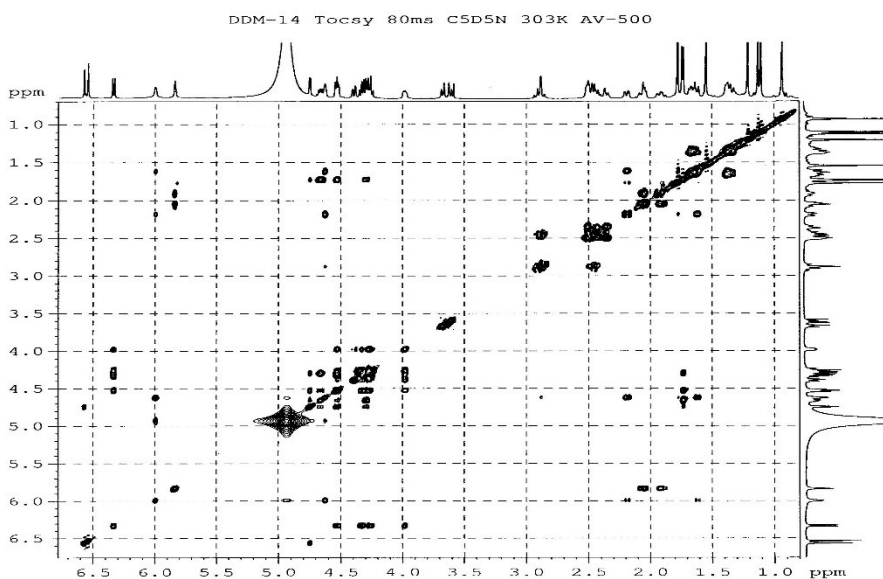

Figure S55. The TOCSY Spectrum of **5** in C<sub>5</sub>D<sub>5</sub>N

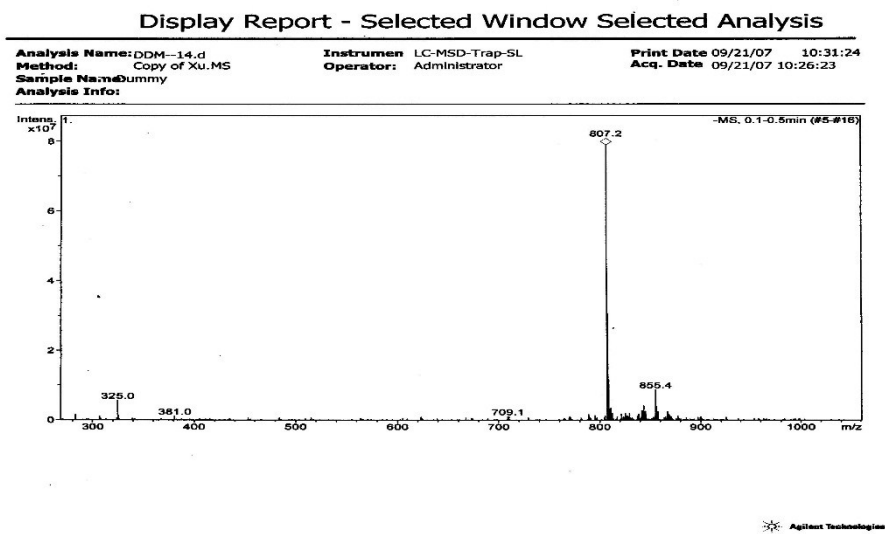

Figure S56. The HRESIMS Data of **5**

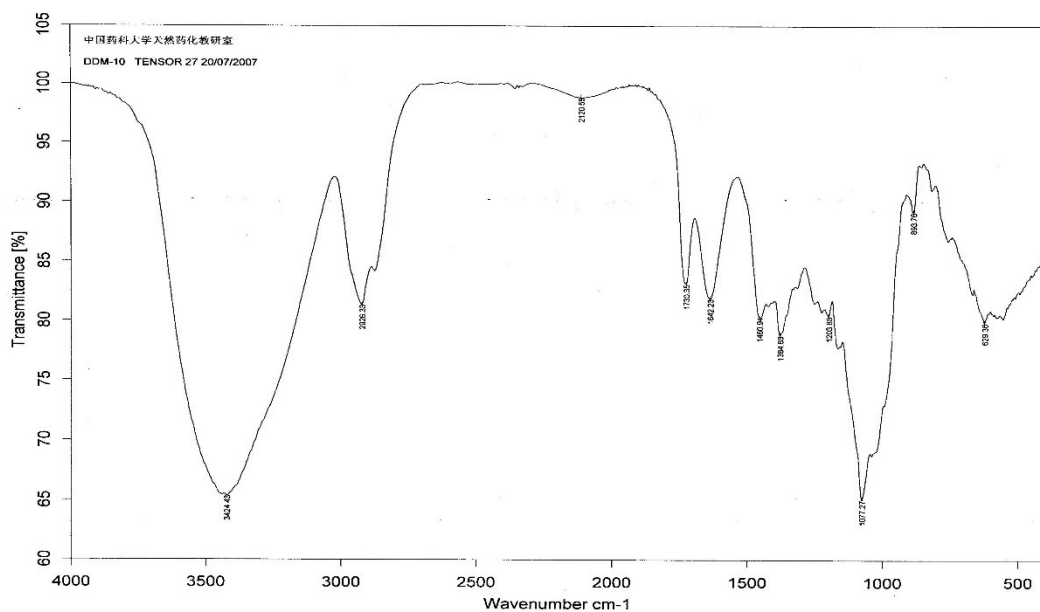

Figure S57. IR Spectrum of **6** in (KBr)

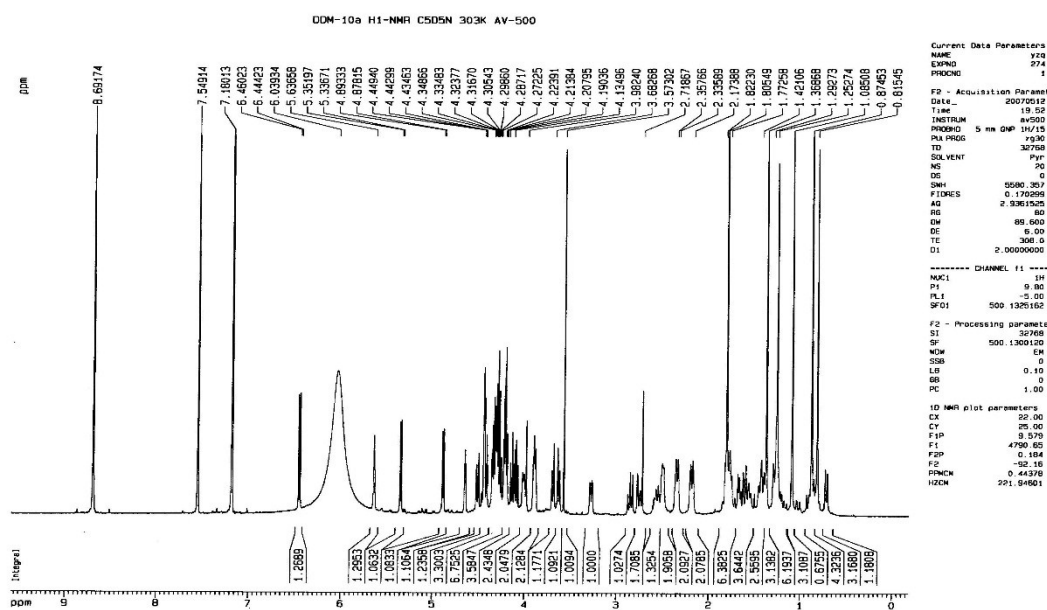

Figure S58. The  $^1\text{H}$  NMR Spectrum of **6** in  $\text{C}_5\text{D}_5\text{N}$  (500 MHz)



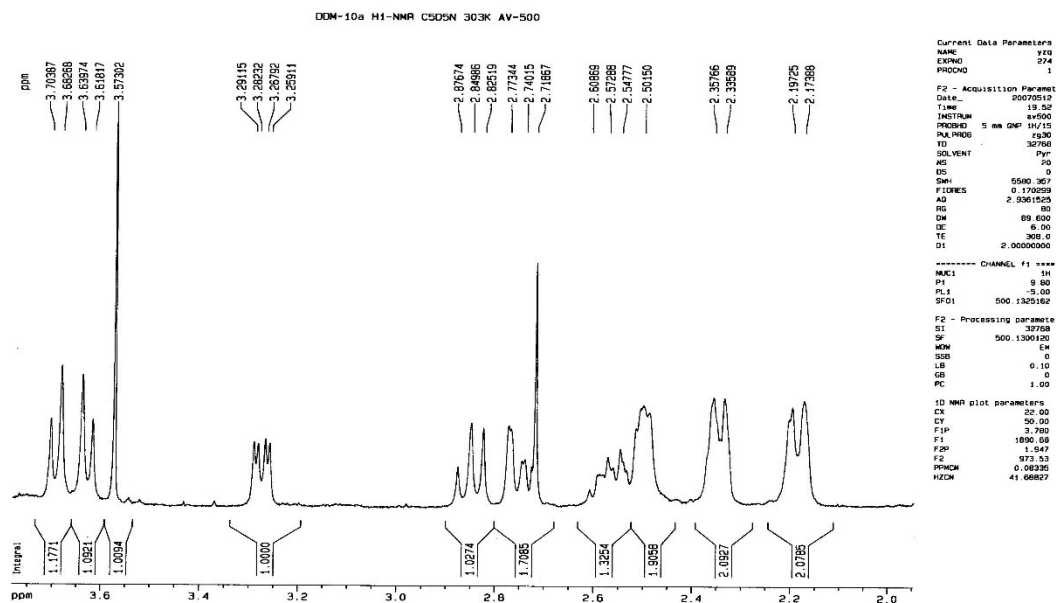

Figure S59. The  $^1\text{H}$  NMR Spectrum of **6** in  $\text{C}_5\text{D}_5\text{N}$  (500 MHz) (enlarged)

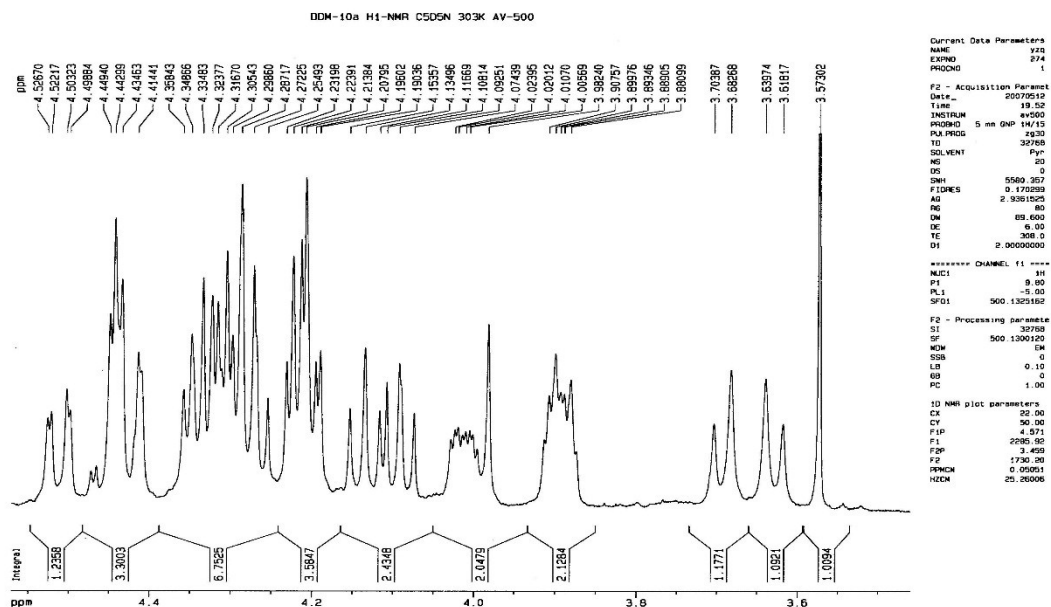

Figure S60. The  $^1\text{H}$  NMR Spectrum of **6** in  $\text{C}_5\text{D}_5\text{N}$  (500 MHz) (enlarged)

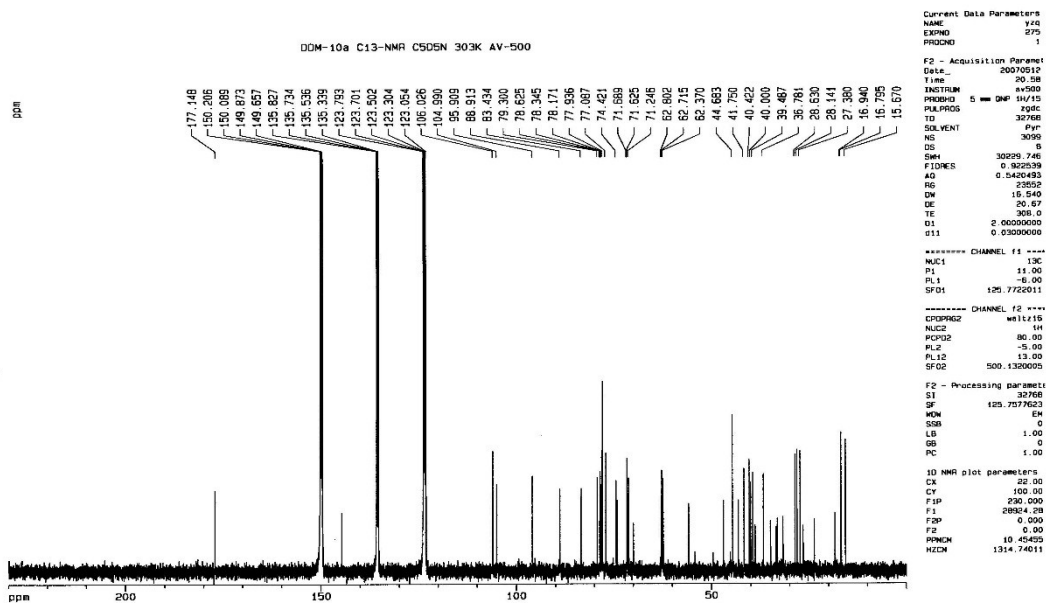

Figure S61. The  $^{13}\text{C}$  NMR Spectrum of **6** in  $\text{C}_5\text{D}_5\text{N}$  (125 MHz)

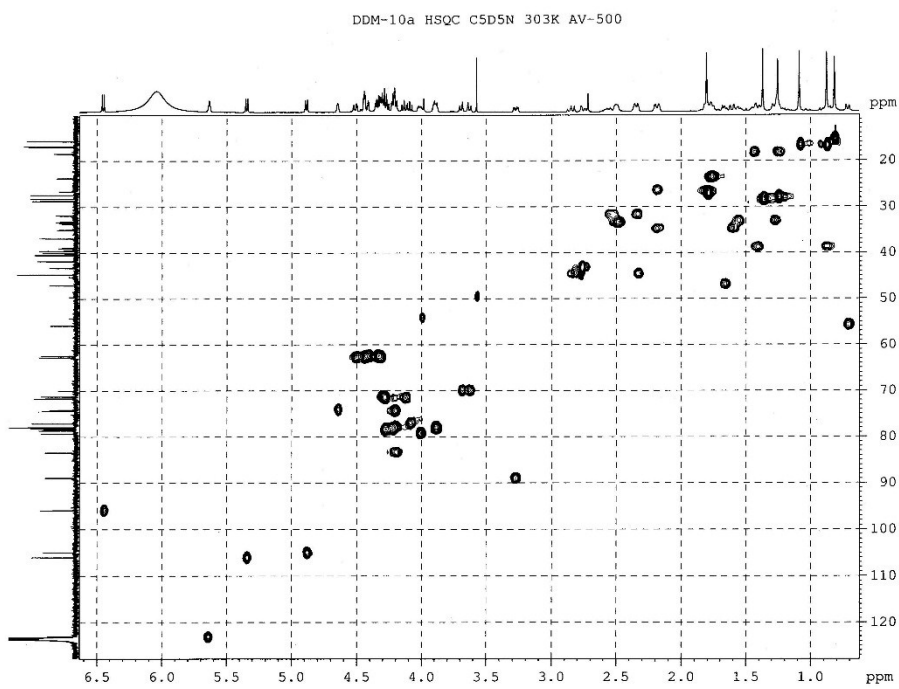

Figure S62. The HSQC Spectrum of **6** in  $\text{C}_5\text{D}_5\text{N}$

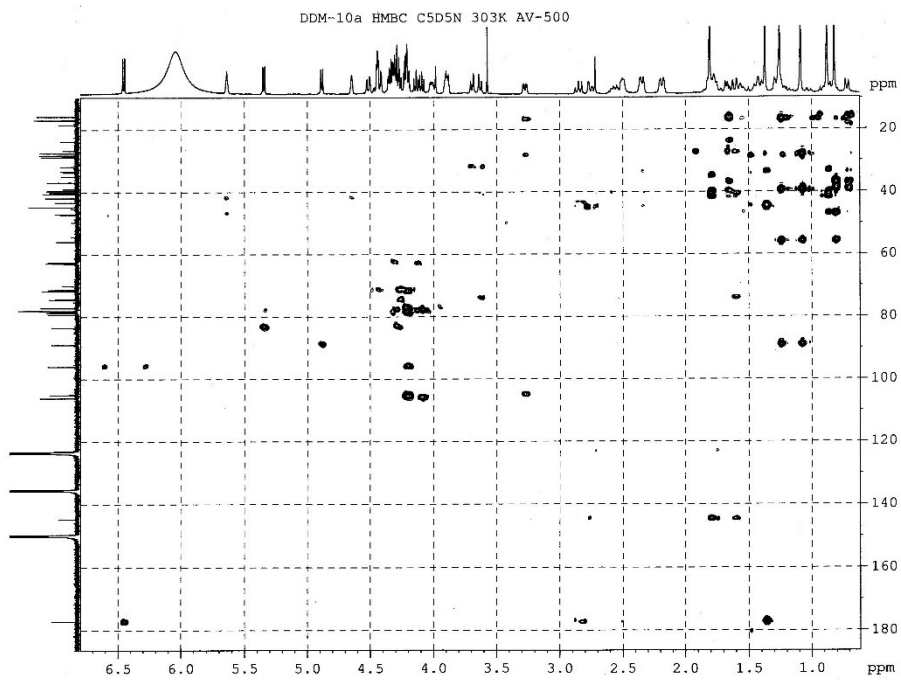

Figure S63. The HMBC Spectrum of **6** in C<sub>5</sub>D<sub>5</sub>N

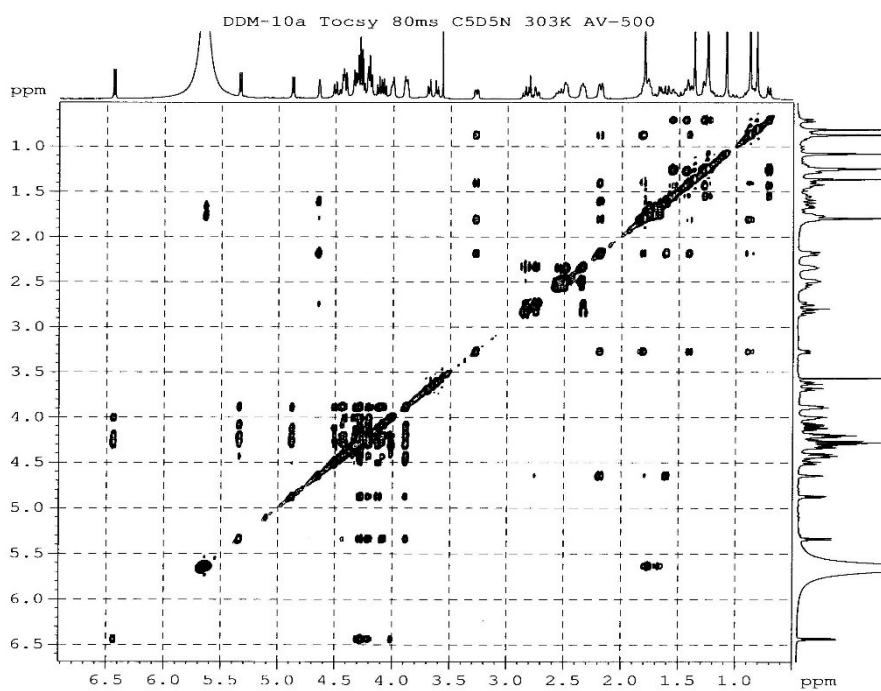

Figure S64. The TOCSY Spectrum of **6** in C<sub>5</sub>D<sub>5</sub>N

DDM-10

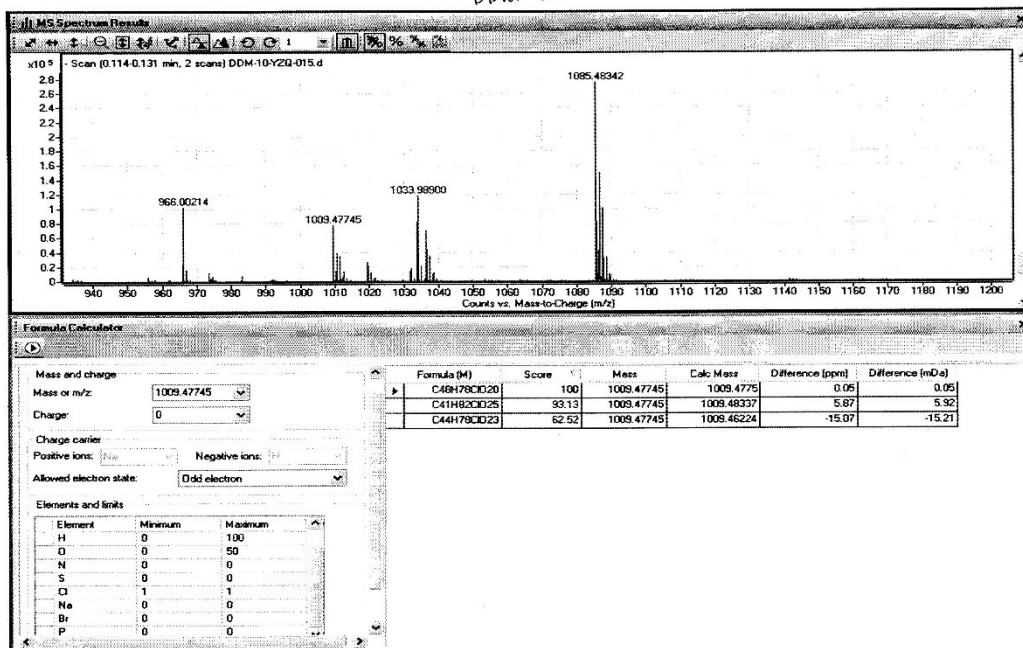

Figure S65. The HRESIMS Data of 6
